# Supplementary material for: Diels–Alder cycloaddition polymerization of highly aromatic polyimides and their multiblock copolymers
Source: Royal Society of Chemistry journal article supplement (doi:10.1039/d1py00314c), 2021-01-01
Supplement: d1py00314c1.pdf [file d1py00314c1.pdf]

## Electronic supplementary information

# Diels-Alder cycloaddition polymerization of highly aromatic polyimides and their multiblock copolymers

Doris Cristurean<sup>a</sup>, Stephan Schaumüller<sup>a</sup>, Paul Strasser<sup>a</sup>, Stephan Haudum<sup>a</sup>, Markus Himmelsbach<sup>b</sup>, Matthias Bechmann<sup>c</sup>, Oliver Brüggemann<sup>a</sup>, Ian Teasdale<sup>a\*</sup>

<sup>a</sup> Institute of Polymer Chemistry, Johannes Kepler University Linz, Altenbergerstraße 69, 4040 Linz, Austria

E-mail: [ian.teasdale@jku.at](mailto:ian.teasdale@jku.at)

<sup>b</sup> Institute of Analytical Chemistry, Johannes Kepler University Linz, Altenbergerstraße 69, 4040 Linz, Austria

<sup>c</sup> Institute of Organic Chemistry, Johannes Kepler University Linz, Altenbergerstraße 69, 4040 Linz, Austria

## Content

|                                               |    |
|-----------------------------------------------|----|
| Compound 3 .....                              | 2  |
| Compound 5 .....                              | 4  |
| Compound 6 .....                              | 6  |
| PI-1 .....                                    | 8  |
| PI-2 .....                                    | 12 |
| PI-3 .....                                    | 16 |
| PI-4 .....                                    | 20 |
| PI-5 .....                                    | 24 |
| PI-6 .....                                    | 28 |
| PI-7 .....                                    | 30 |
| PI-8 .....                                    | 34 |
| PI-9 .....                                    | 38 |
| PI-10 .....                                   | 41 |
| PI-11 .....                                   | 45 |
| Comparisons / Overlays/solubility table ..... | 48 |

# Compound 3

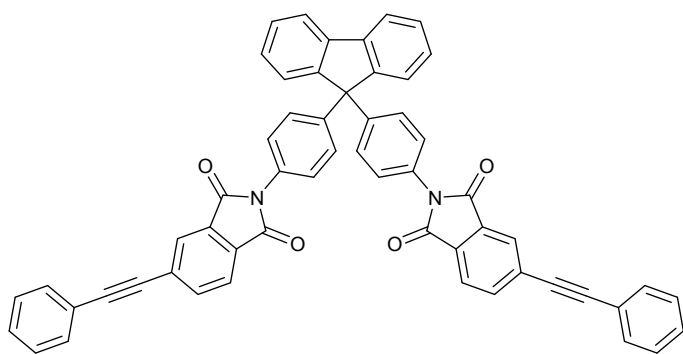

Figure ESI 1: Structure of compound 3

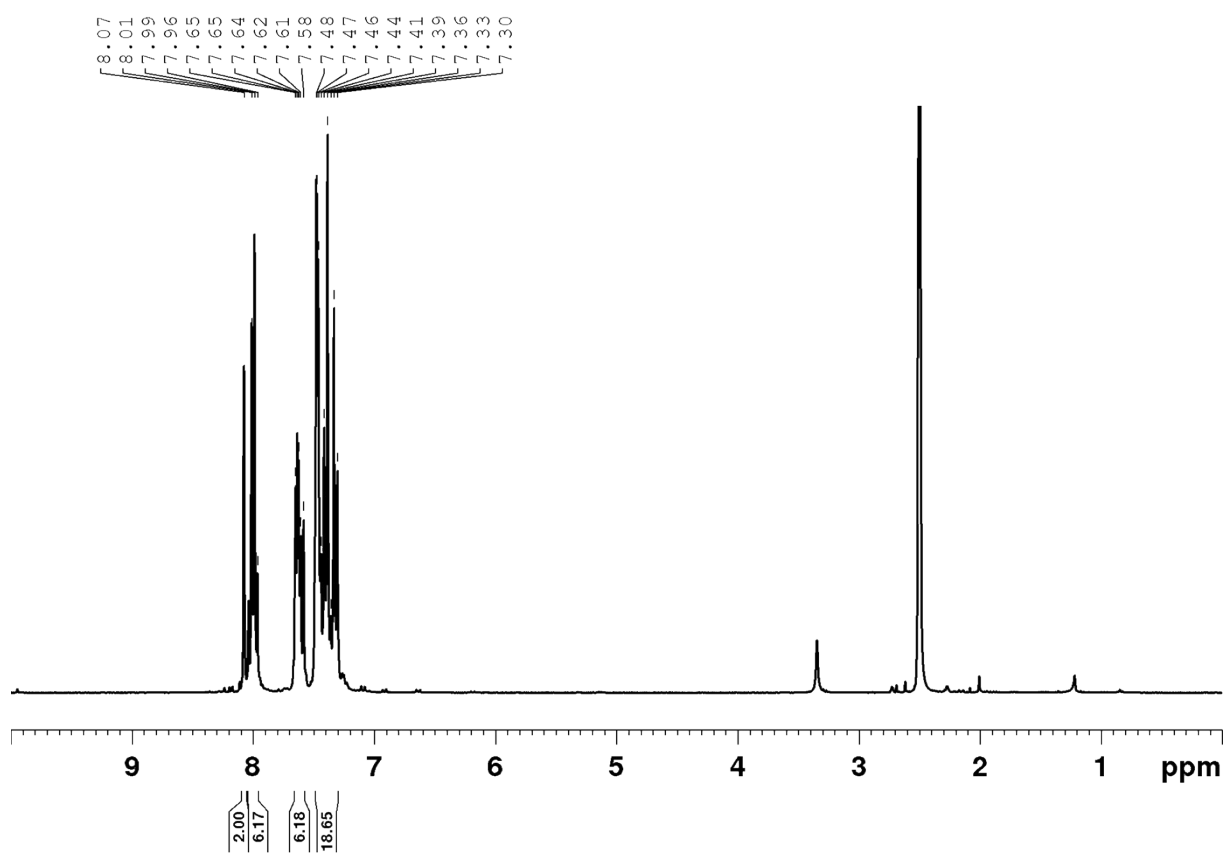

Figure ESI 2: <sup>1</sup>H-NMR of compound 3 in DMSO-d<sub>6</sub>

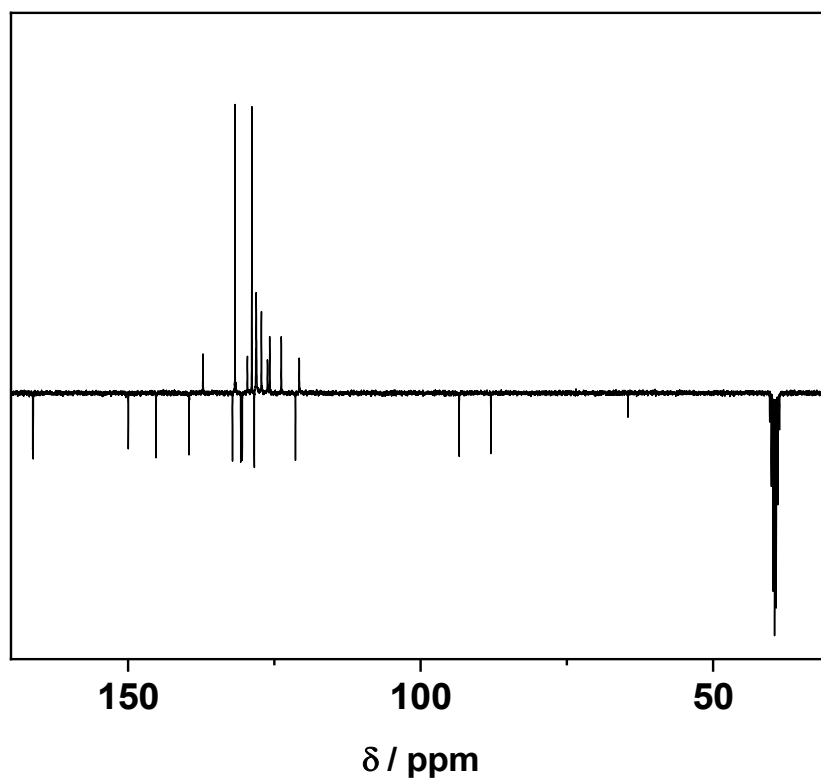

Figure ESI 3:  $^{13}\text{C}$ -NMR of compound **3** in DMSO- $d_6$

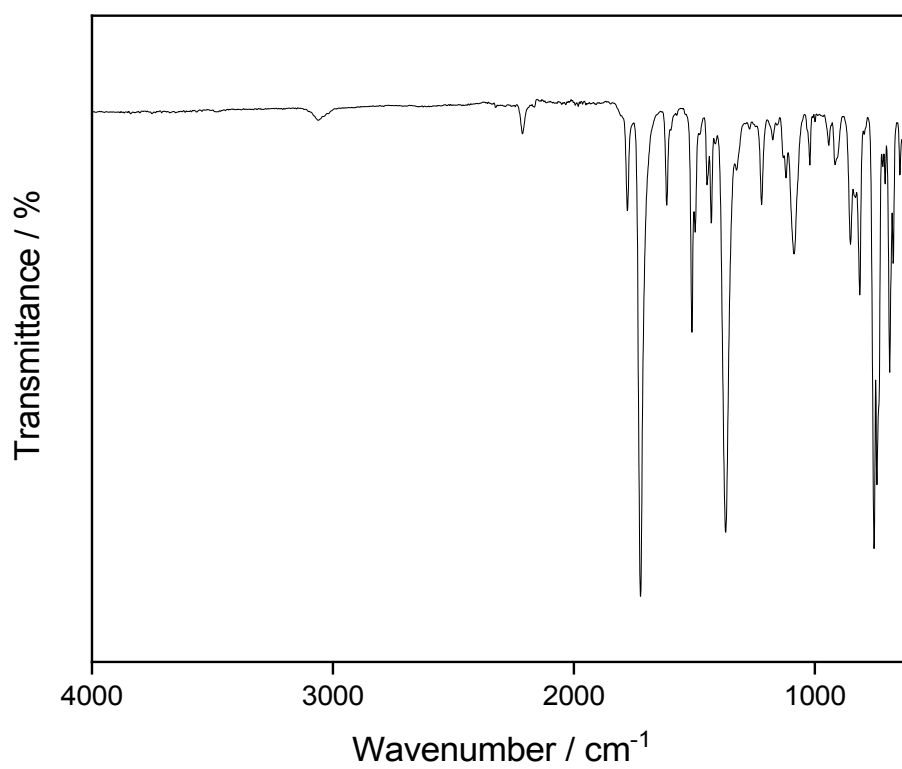

Figure ESI 4: FTIR-ATR of compound **3**

# Compound 5

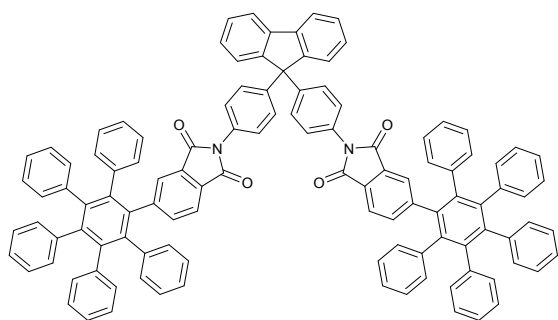

Figure ESI 5: Structure of compound 5

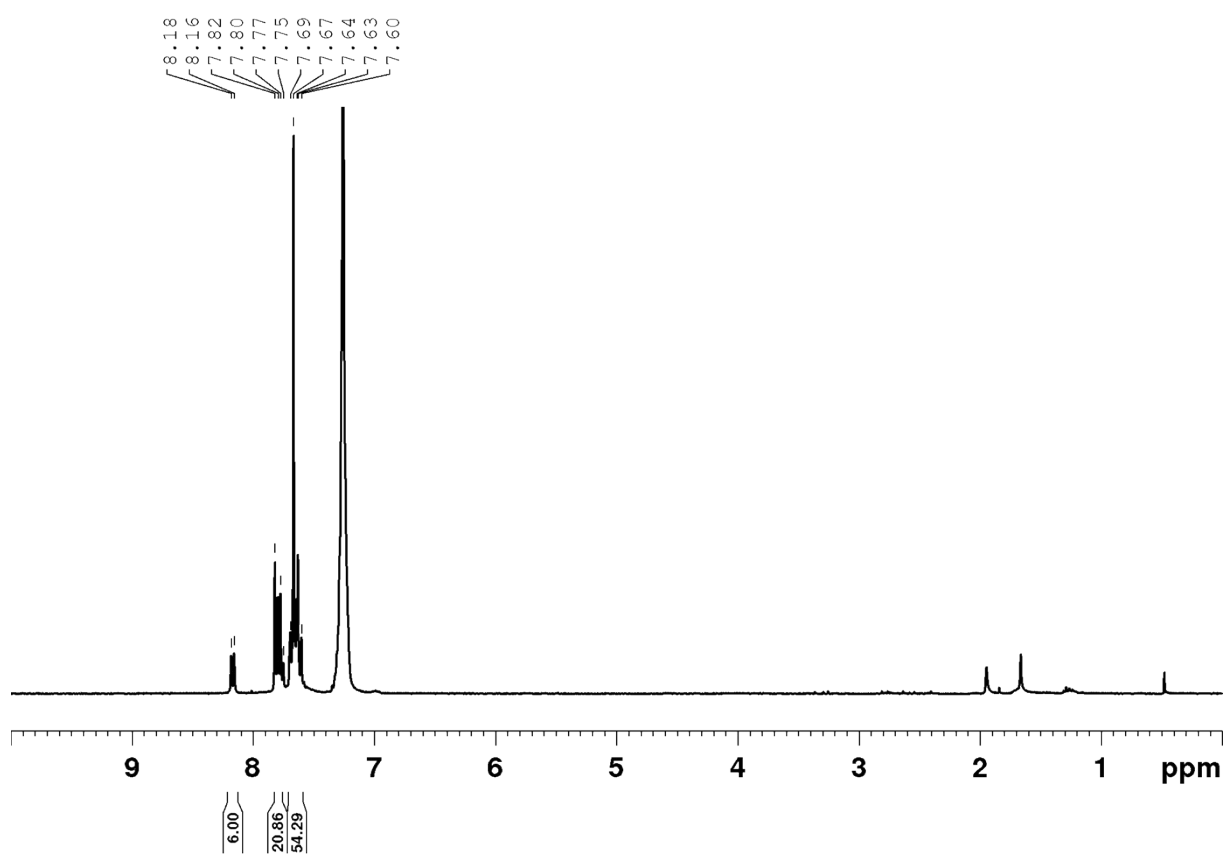

Figure ESI 6: <sup>1</sup>H-NMR of compound 5 in CDCl<sub>3</sub>

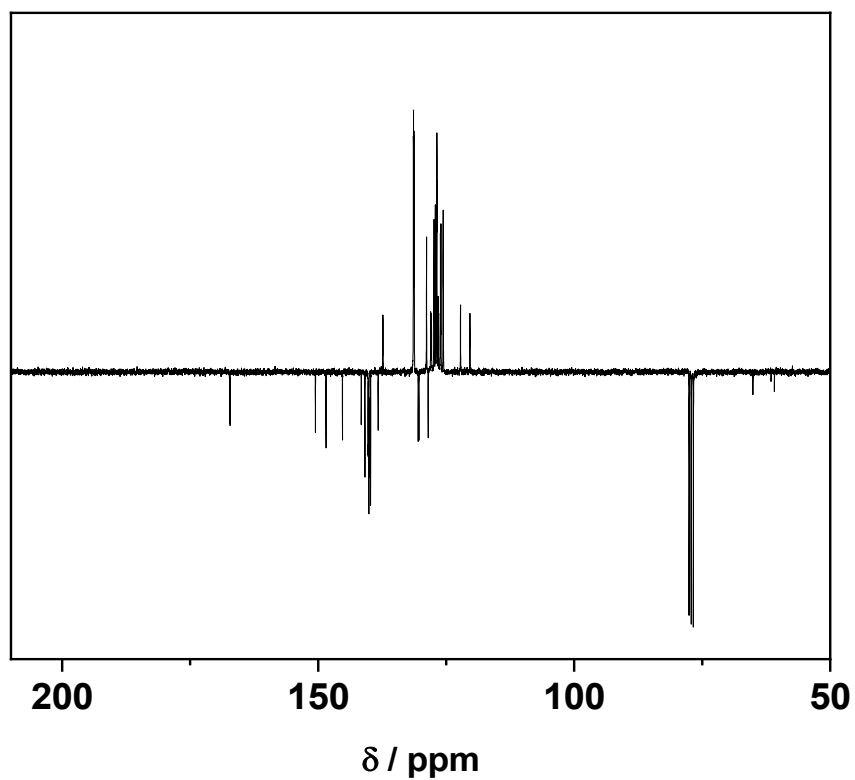

Figure ESI 7:  $^{13}\text{C}$ -NMR of compound 5 in  $\text{CDCl}_3$

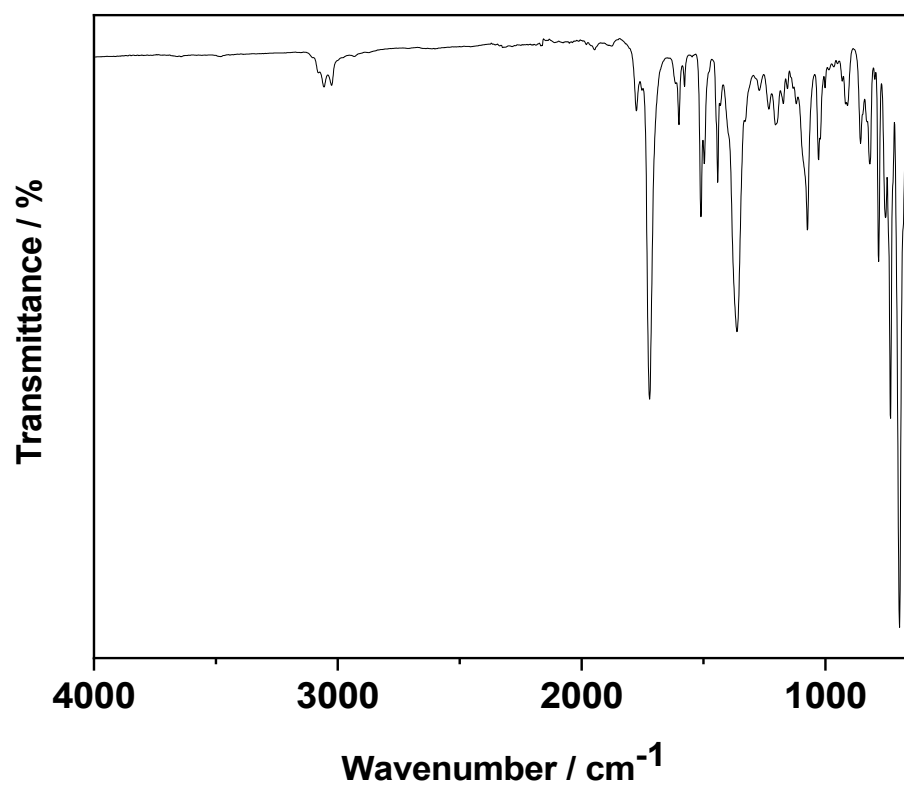

Figure ESI 8: FTIR-ATR of compound 5

# Compound 6

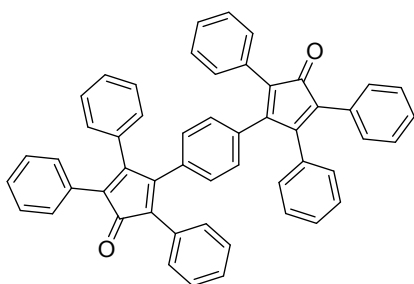

Figure ESI 9: Structure of compound 6

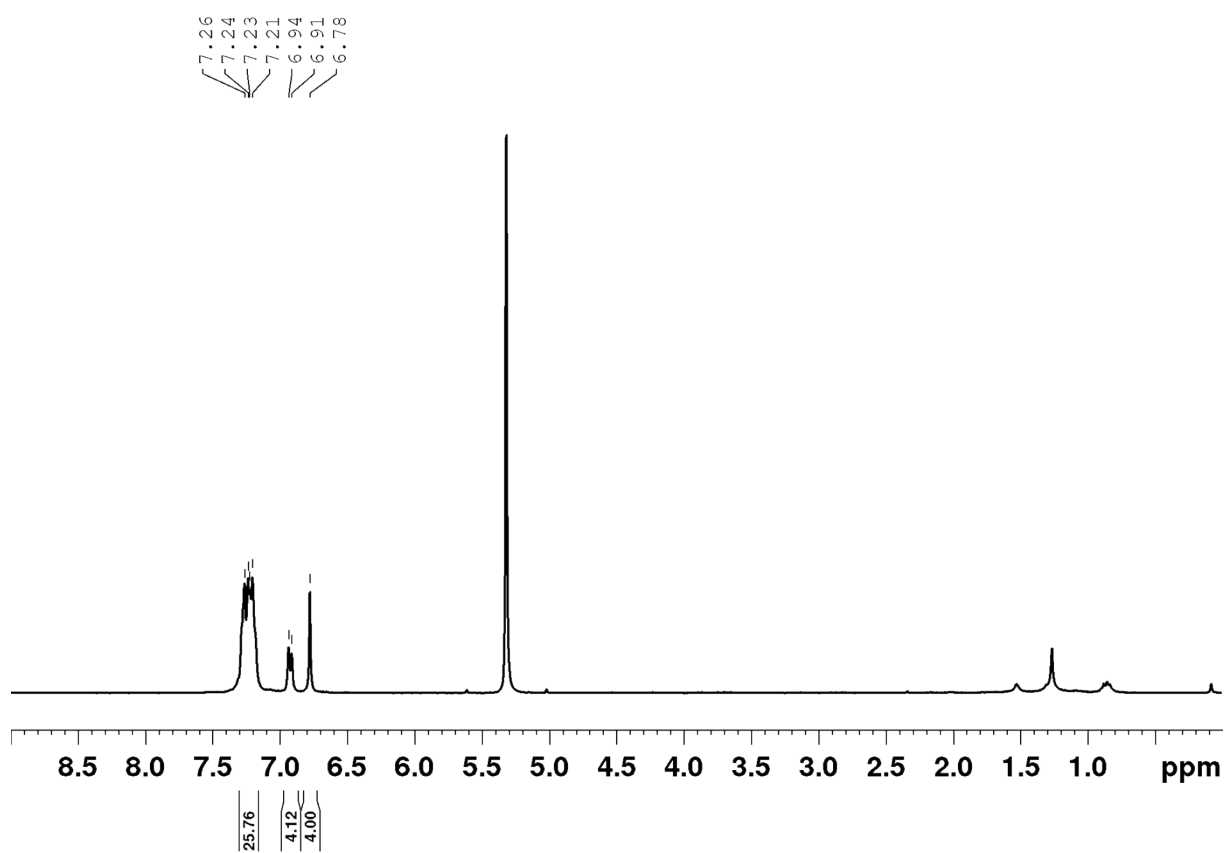

Figure ESI 10:  $^1\text{H-NMR}$  of compound 6 in  $\text{CD}_2\text{Cl}_2$

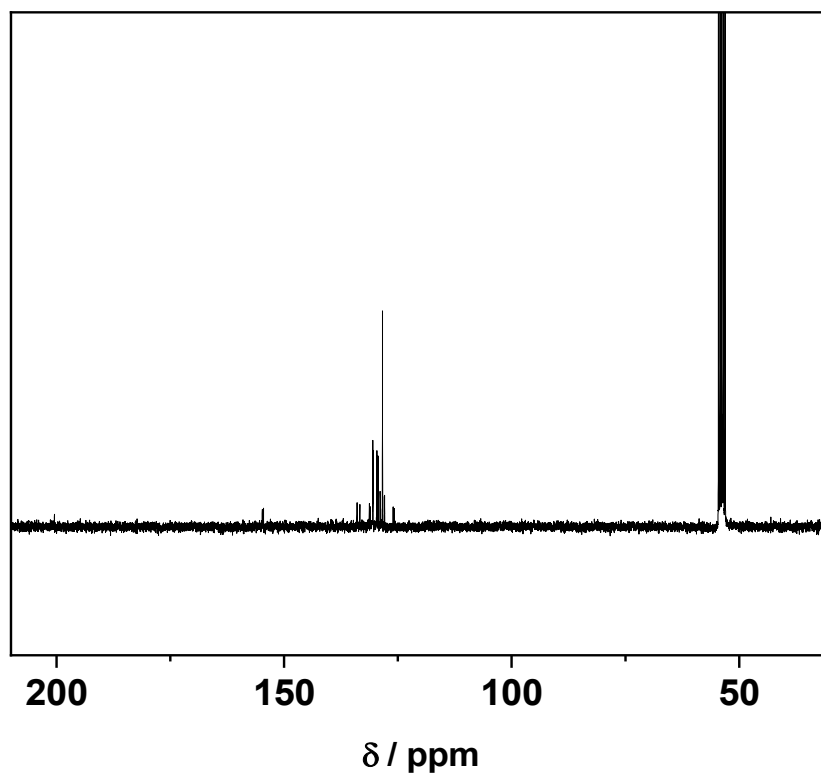

Figure ESI 11:  $^{13}\text{C}$ -NMR of compound **6** in  $\text{CD}_2\text{Cl}_2$

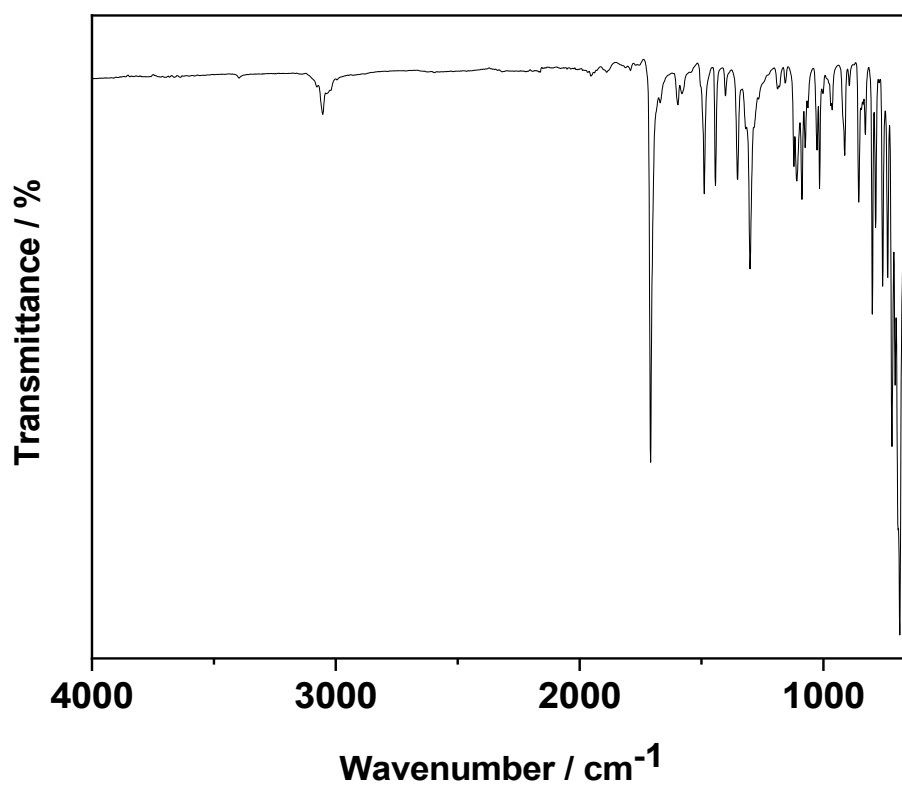

Figure ESI 12: FTIR-ATR of compound **6**

PI-1

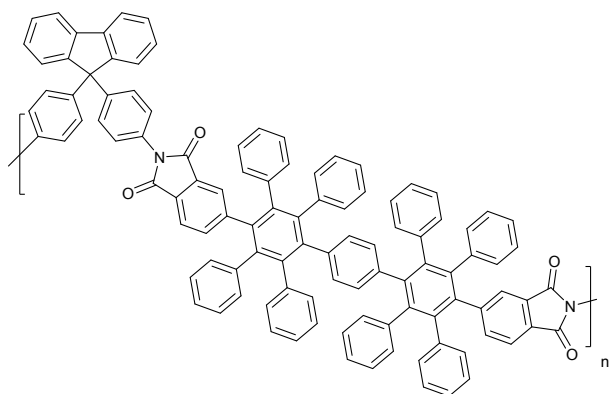

Figure ESI 13: Structure of PI-1

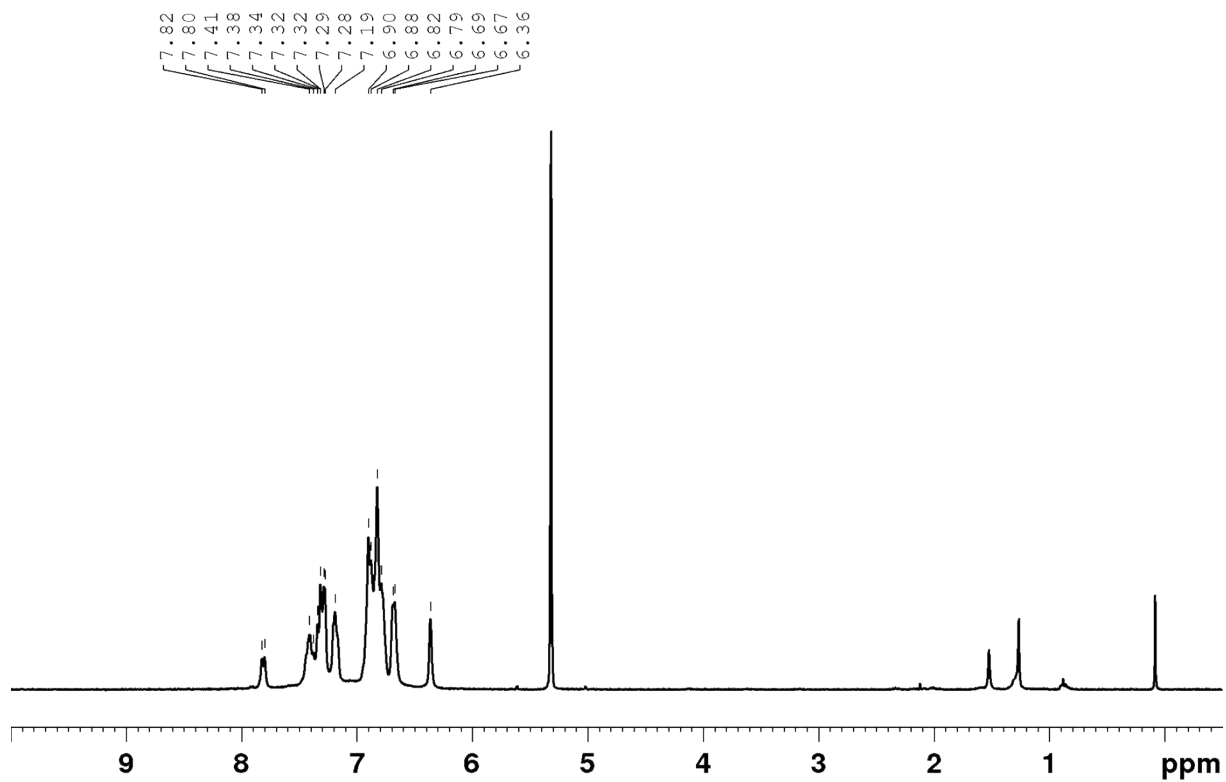

Figure ESI 14: <sup>1</sup>H-NMR of PI-1 in CD<sub>2</sub>Cl<sub>2</sub>



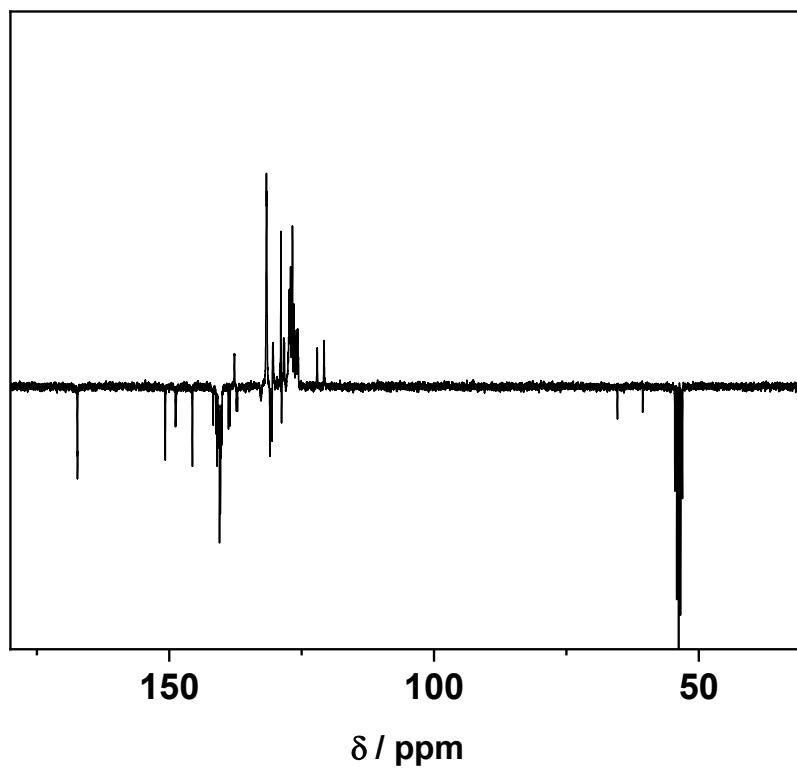

Figure ESI 15:  $^{13}\text{C}$ -NMR of PI-1 in  $\text{CD}_2\text{Cl}_2$

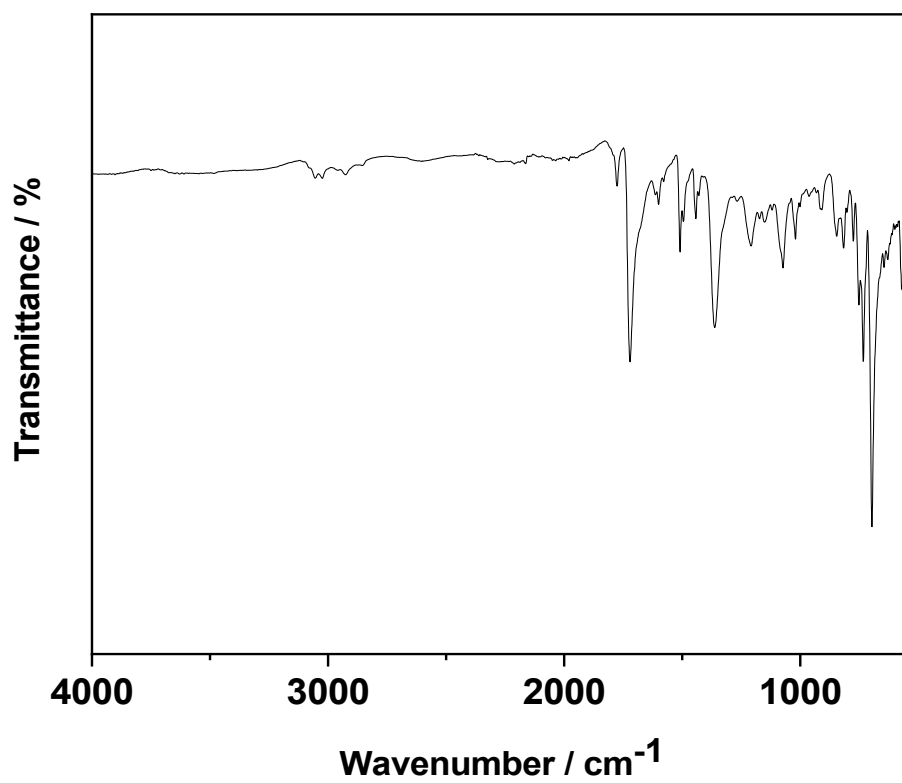

Figure ESI 16: FTIR-ATR of PI-1

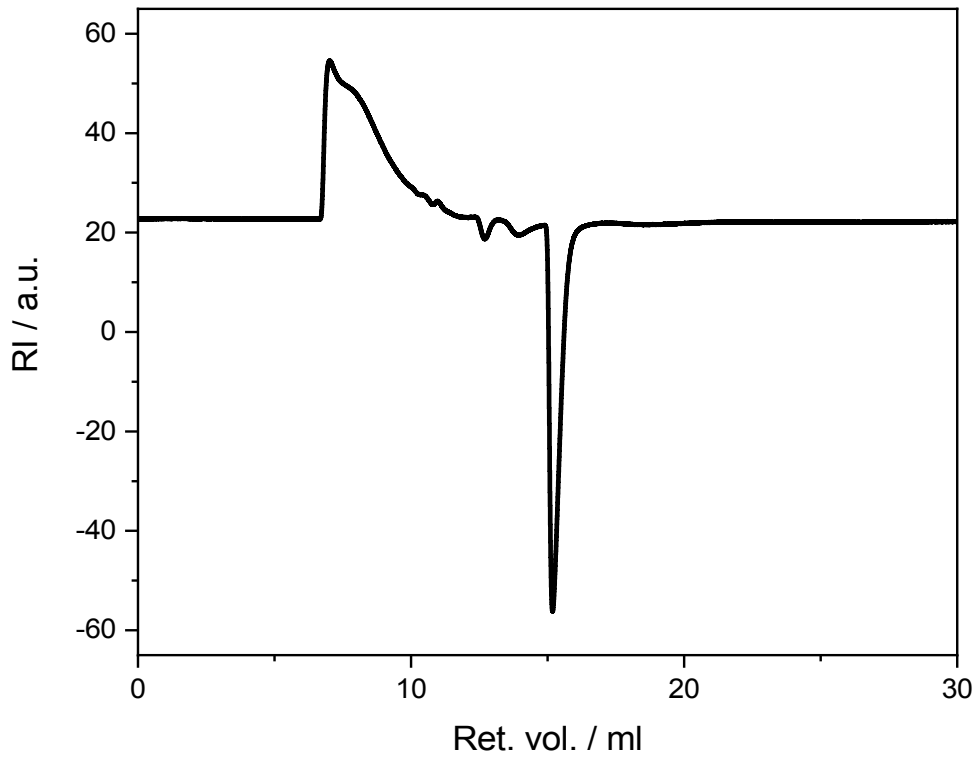

Figure ESI 17: Refractive index detector response of SEC of PI-1

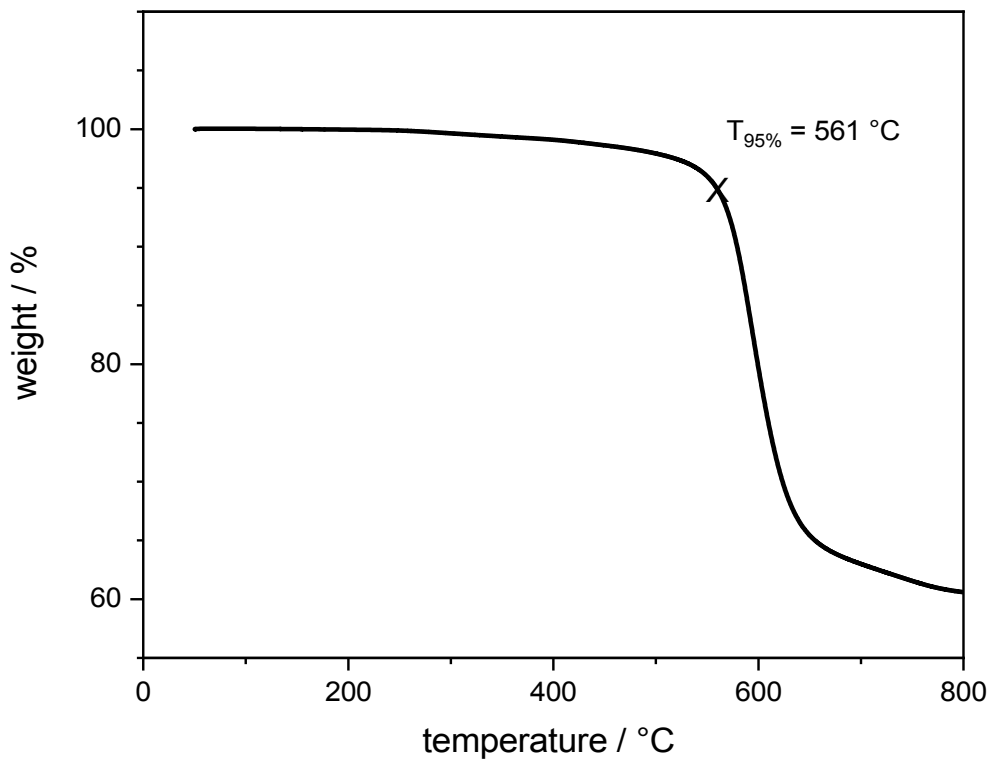

Figure ESI 18: TGA curve of PI-1 (heating rate 10 °C/min)

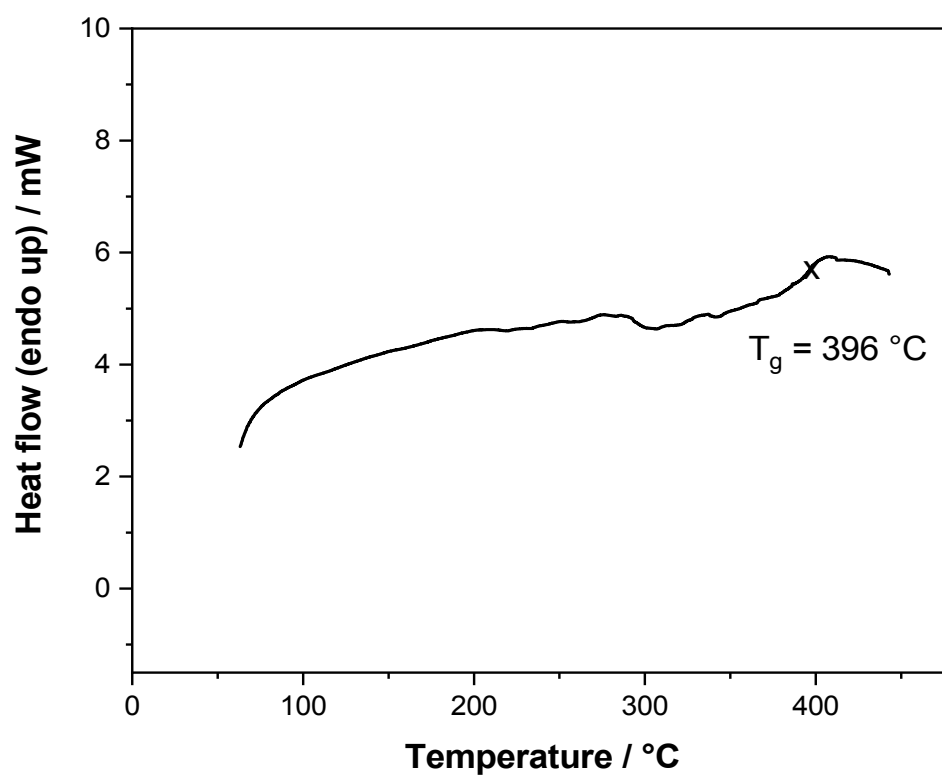

Figure ESI 19: DSC measurement of **PI-1** (second heating cycle, endo up)

PI-2

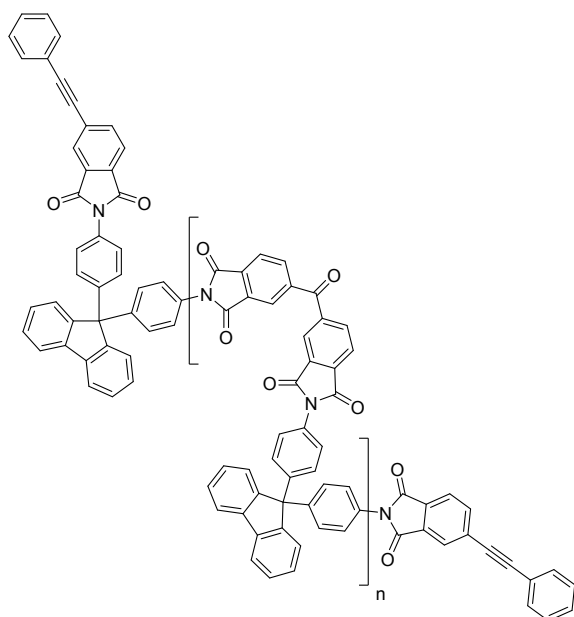

Figure ESI 20: Structure of PI-2

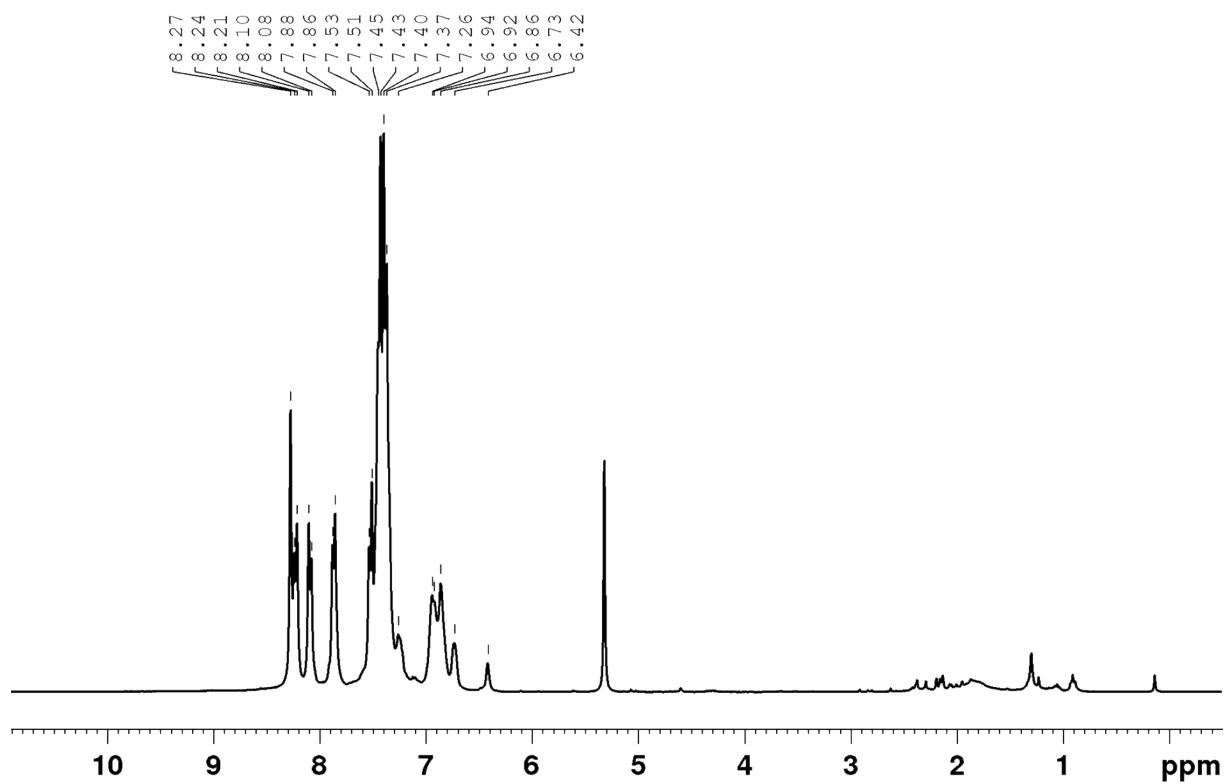

Figure ESI 21: <sup>1</sup>H-NMR of PI-2 in CDCl<sub>3</sub>

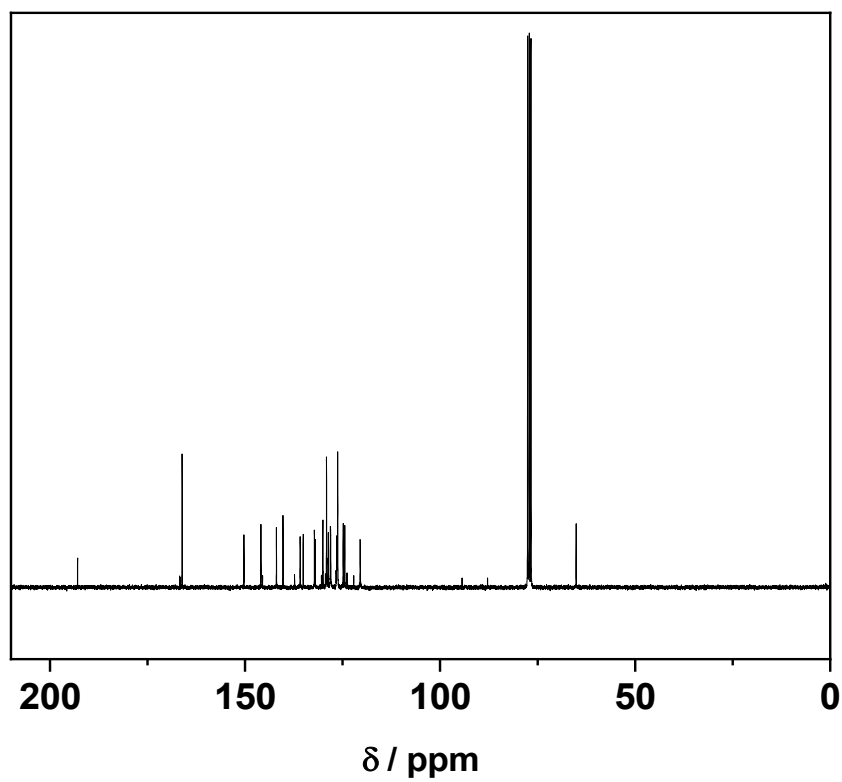

Figure ESI 22:  $^{13}\text{C}$ -NMR of PI-2 in  $\text{CDCl}_3$

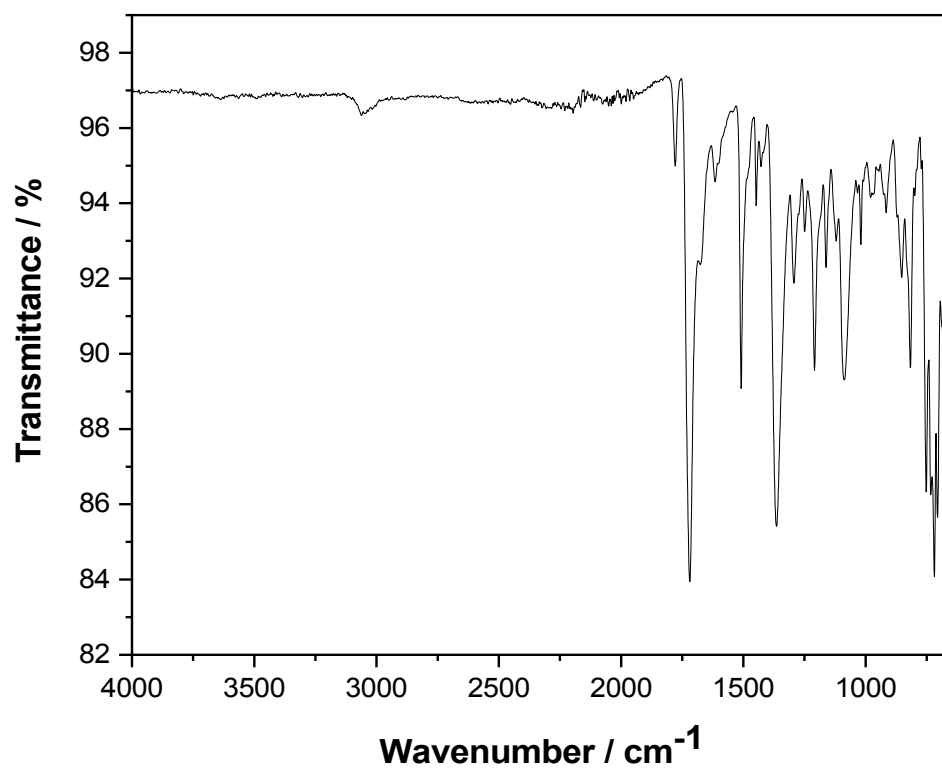

Figure ESI 23: FTIR-ATR of PI-2

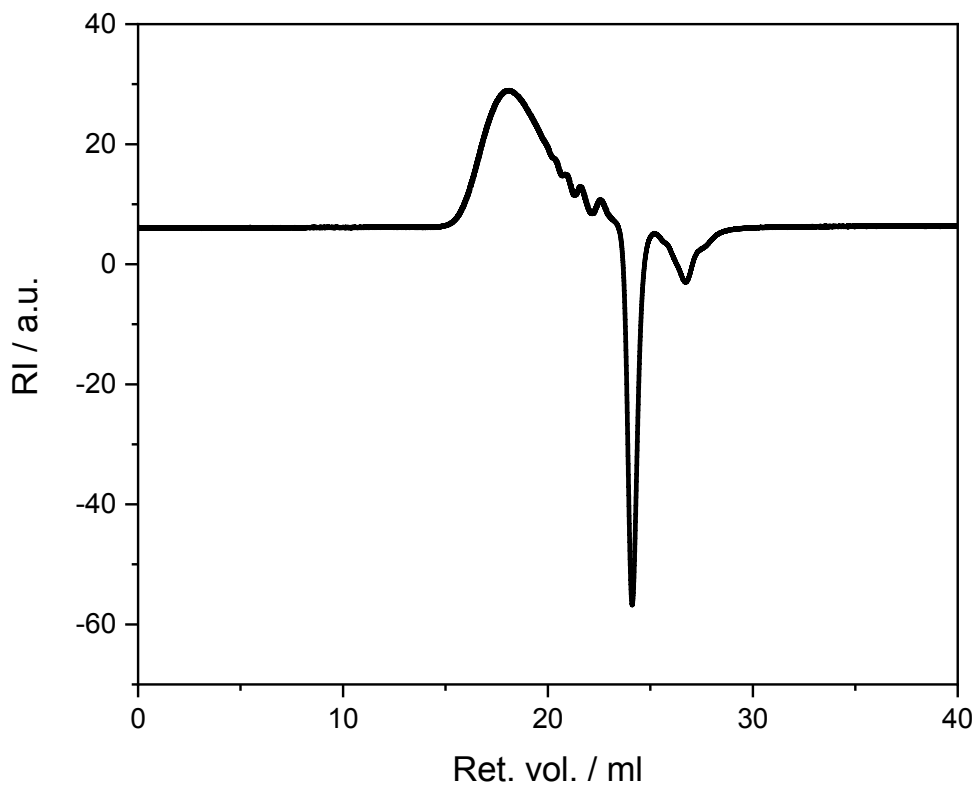

Figure ESI 24: Refractive index detector response of SEC of PI-2

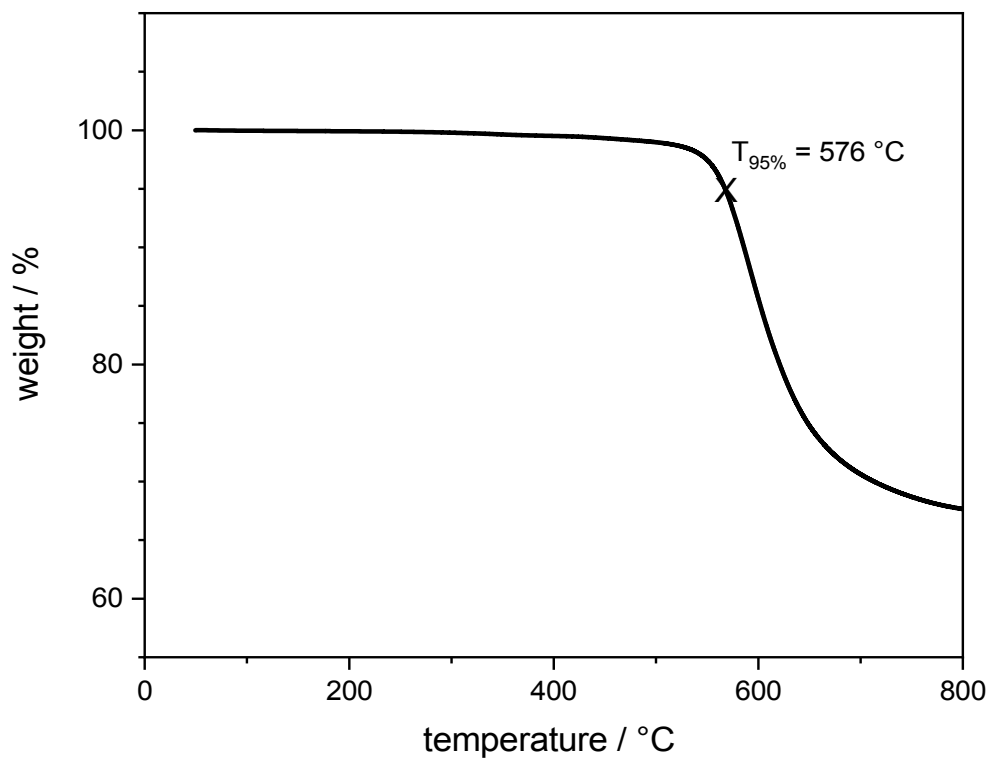

Figure ESI 25: TGA curve of PI-2 (heating rate 10 °C/min)

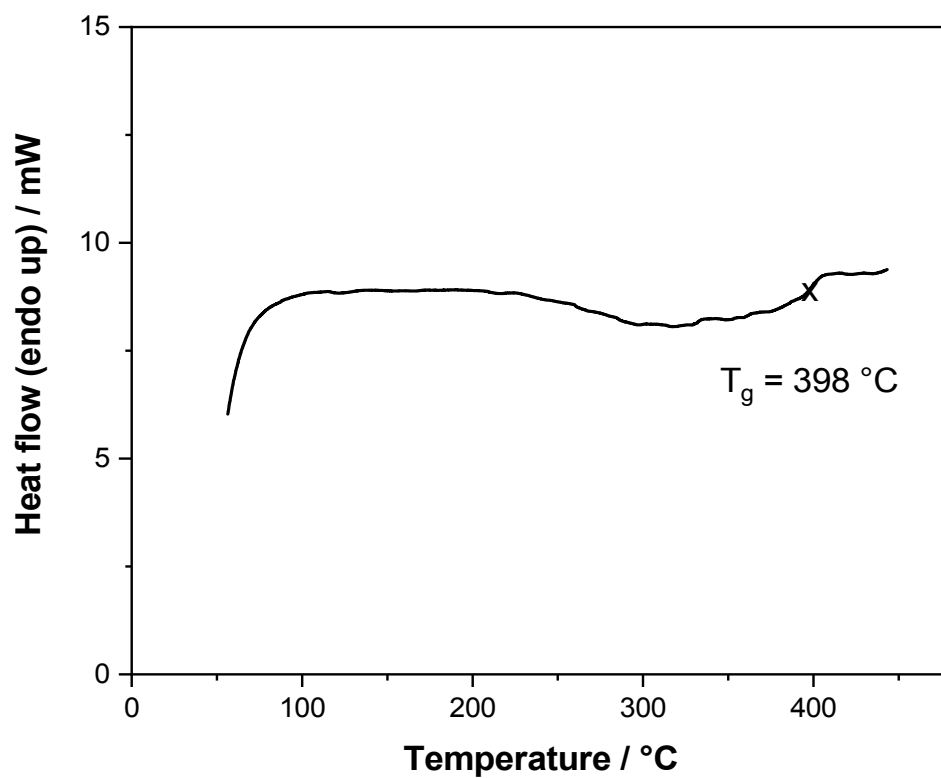

Figure ESI 26: DSC measurement of PI-2 (second heating cycle, endo up)

PI-3

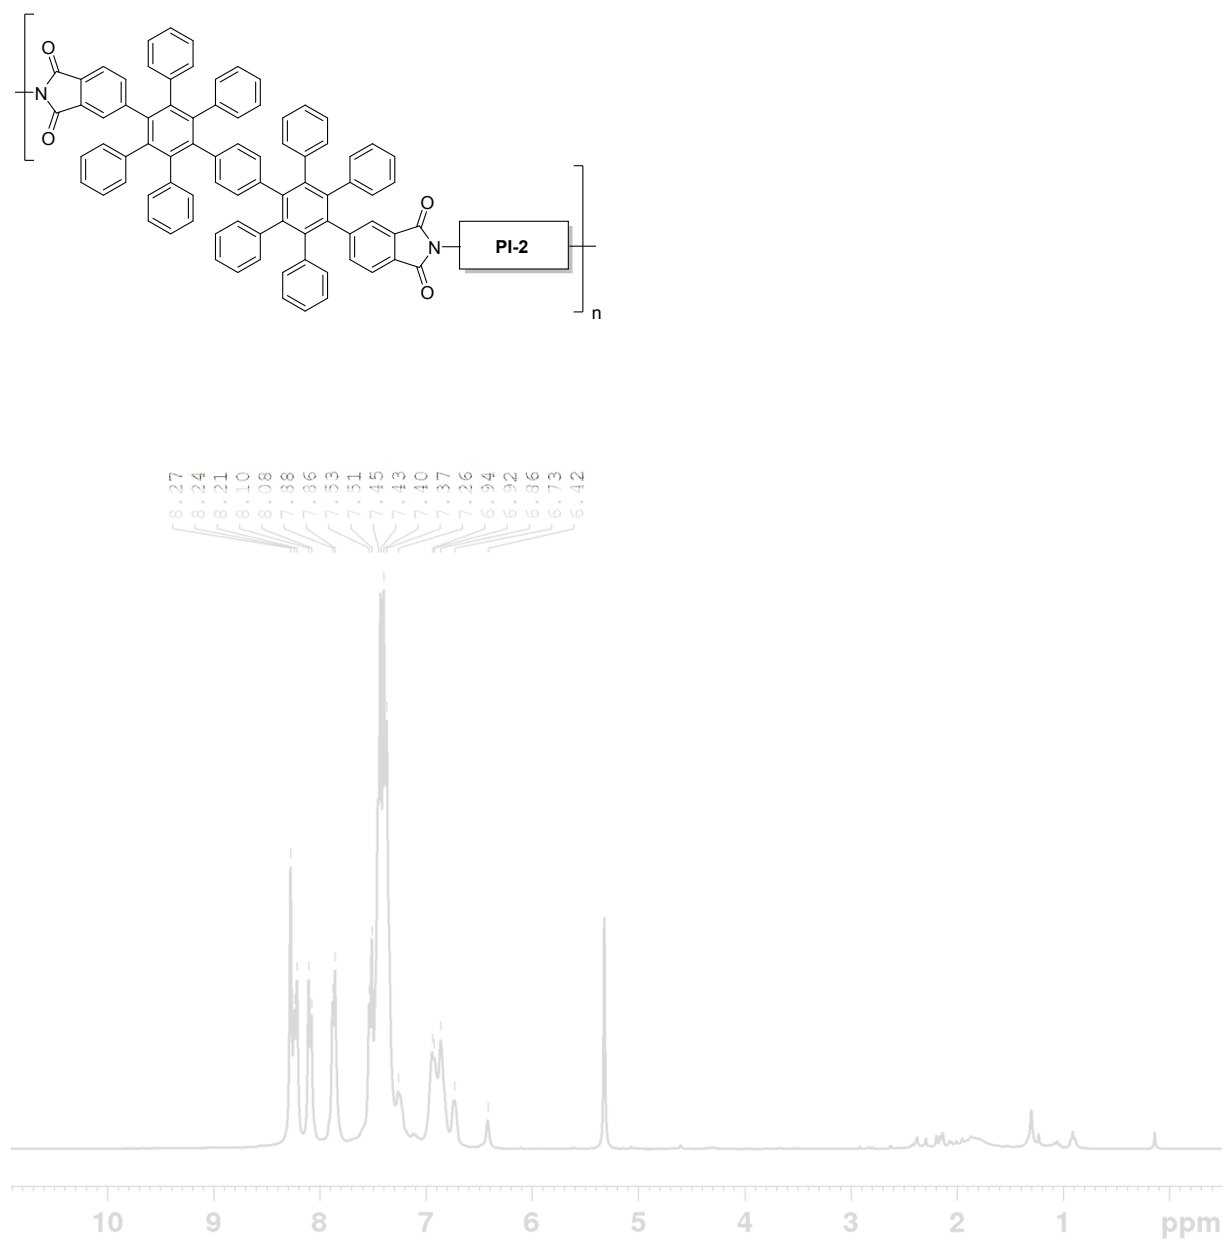

Figure ESI 27:  $^1\text{H-NMR}$  of PI-3 in  $\text{CD}_2\text{Cl}_2$



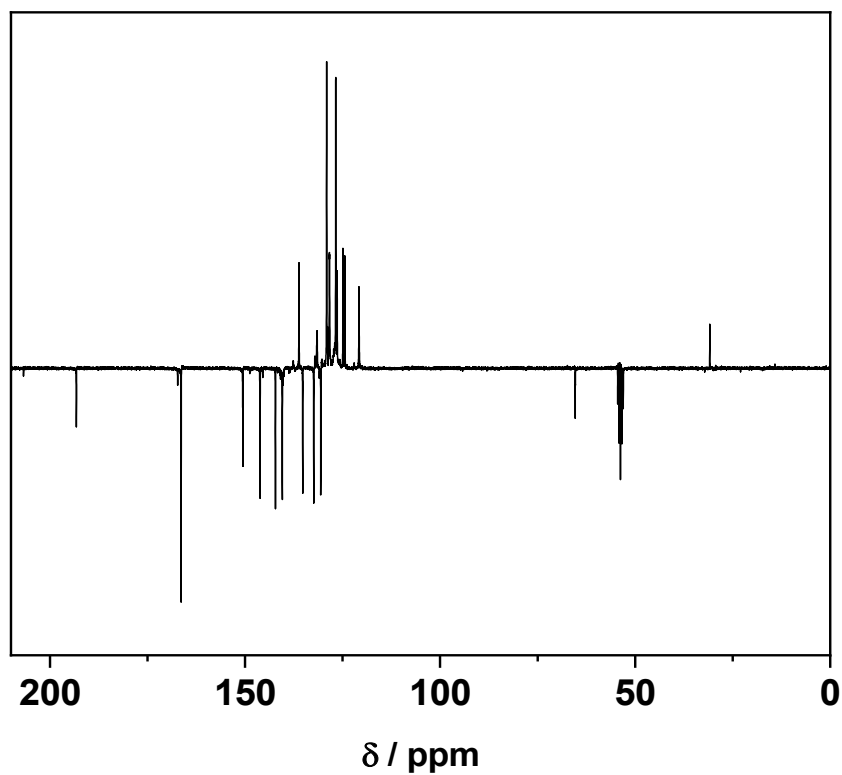

Figure ESI 28:  $^{13}\text{C}$ -NMR of PI-3 in  $\text{CD}_2\text{Cl}_2$

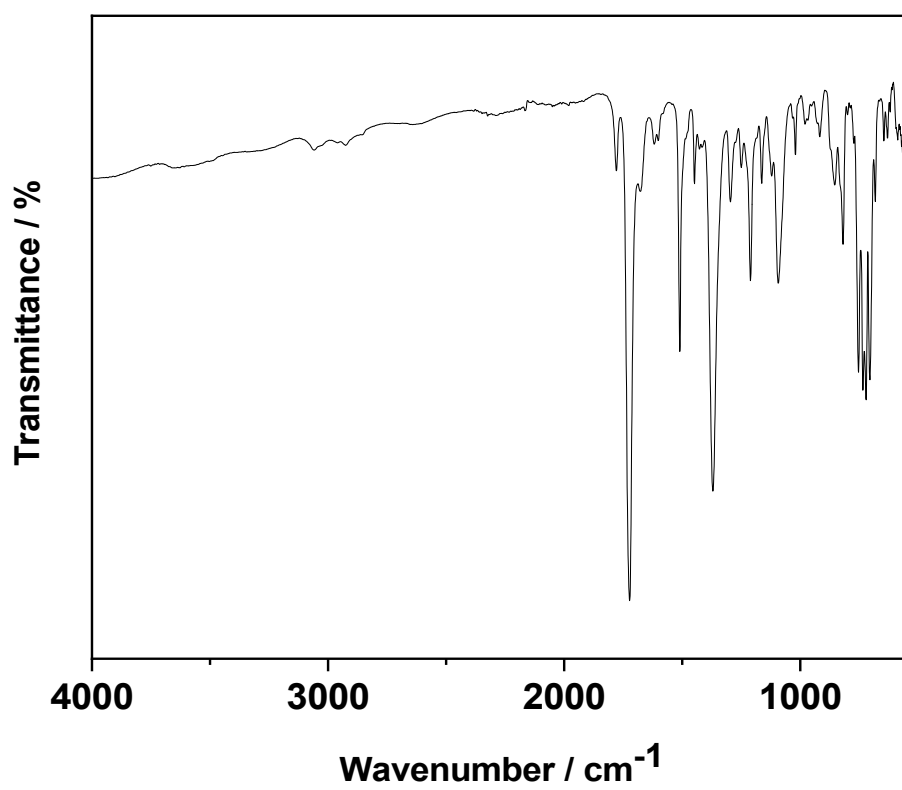

Figure ESI 29: FTIR-ATR of PI-3

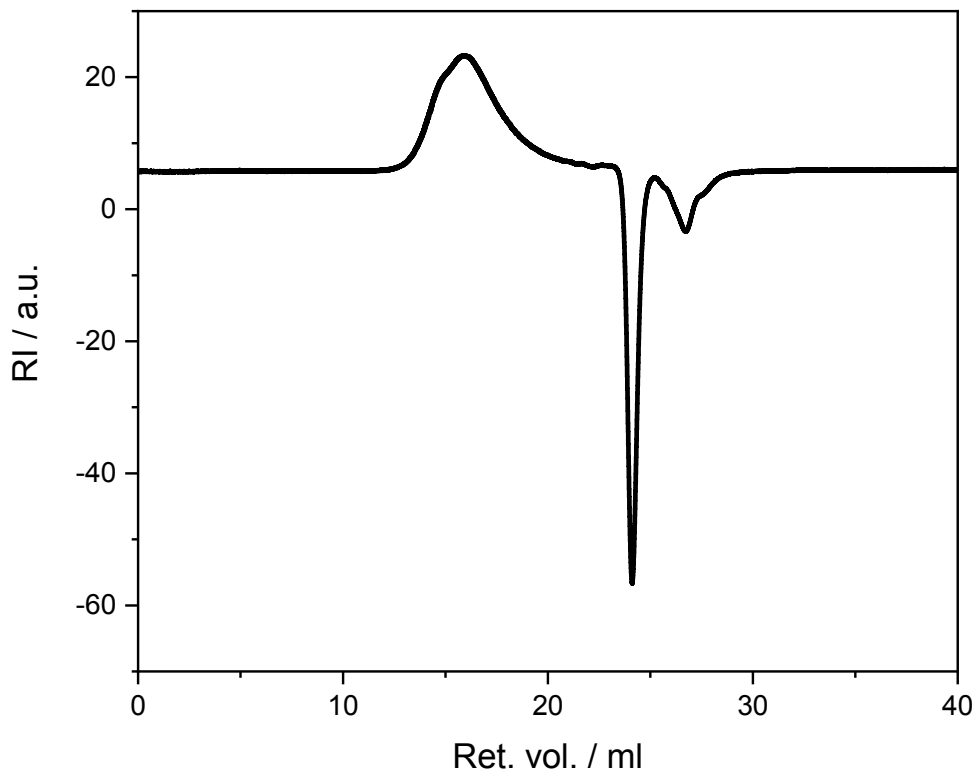

Figure ESI 30: Refractive index detector response of SEC of PI-3

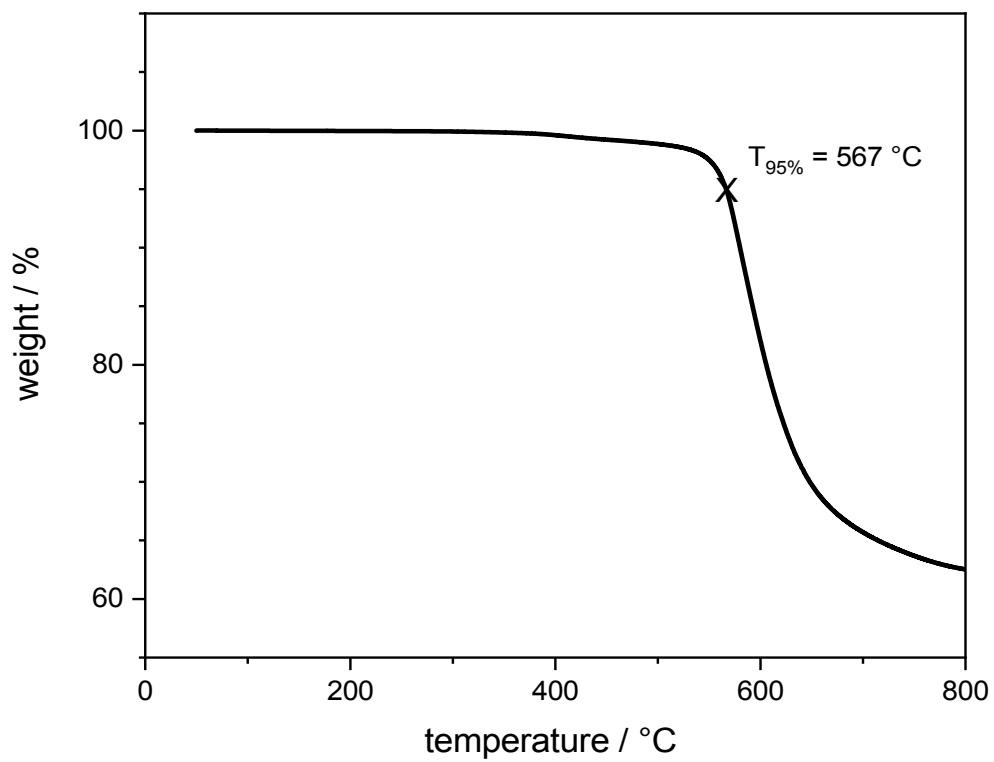

Figure ESI 31: TGA curve of PI-3(heating rate 10 °C/min)

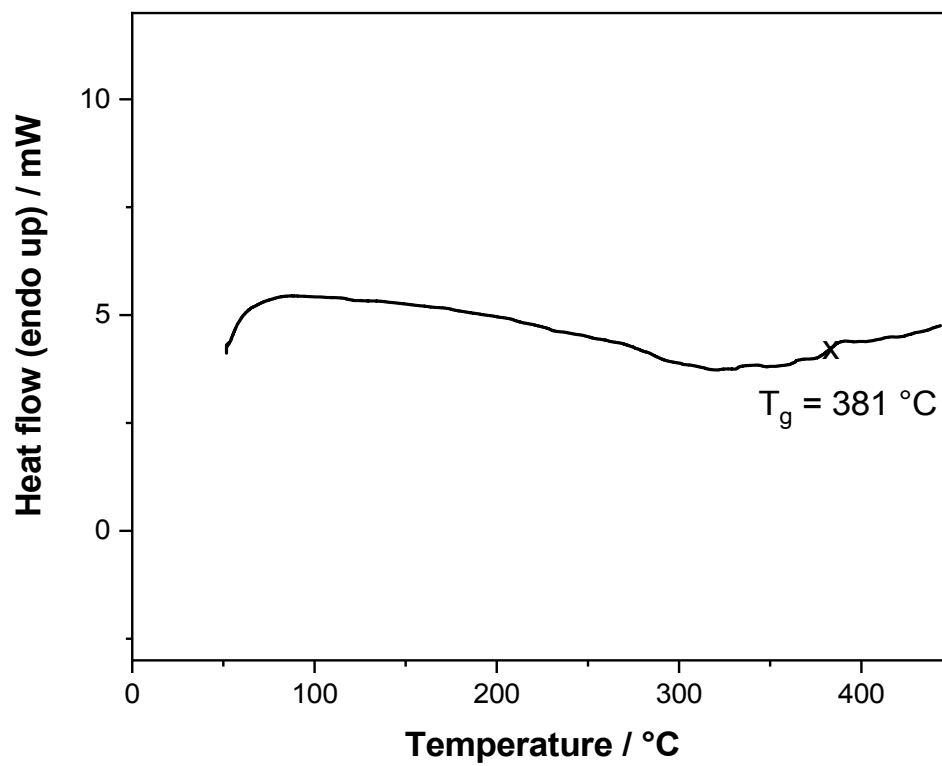

Figure ESI 32: DSC measurement of PI-3 (second heating cycle, endo up)

PI-4

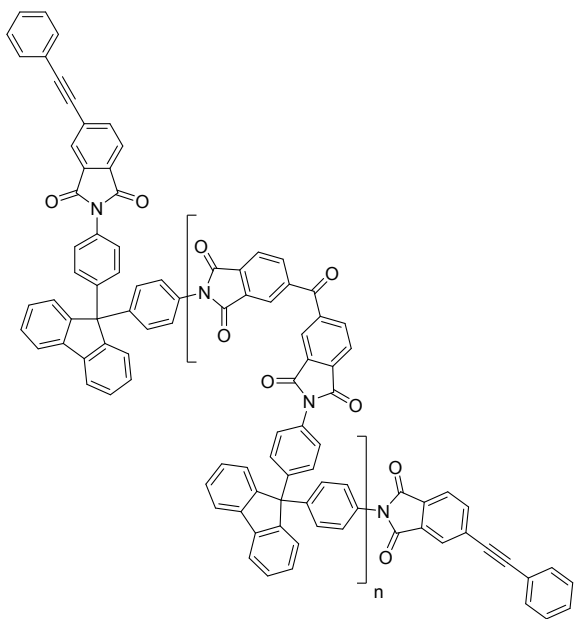

Figure ESI 33: Structure of PI-4

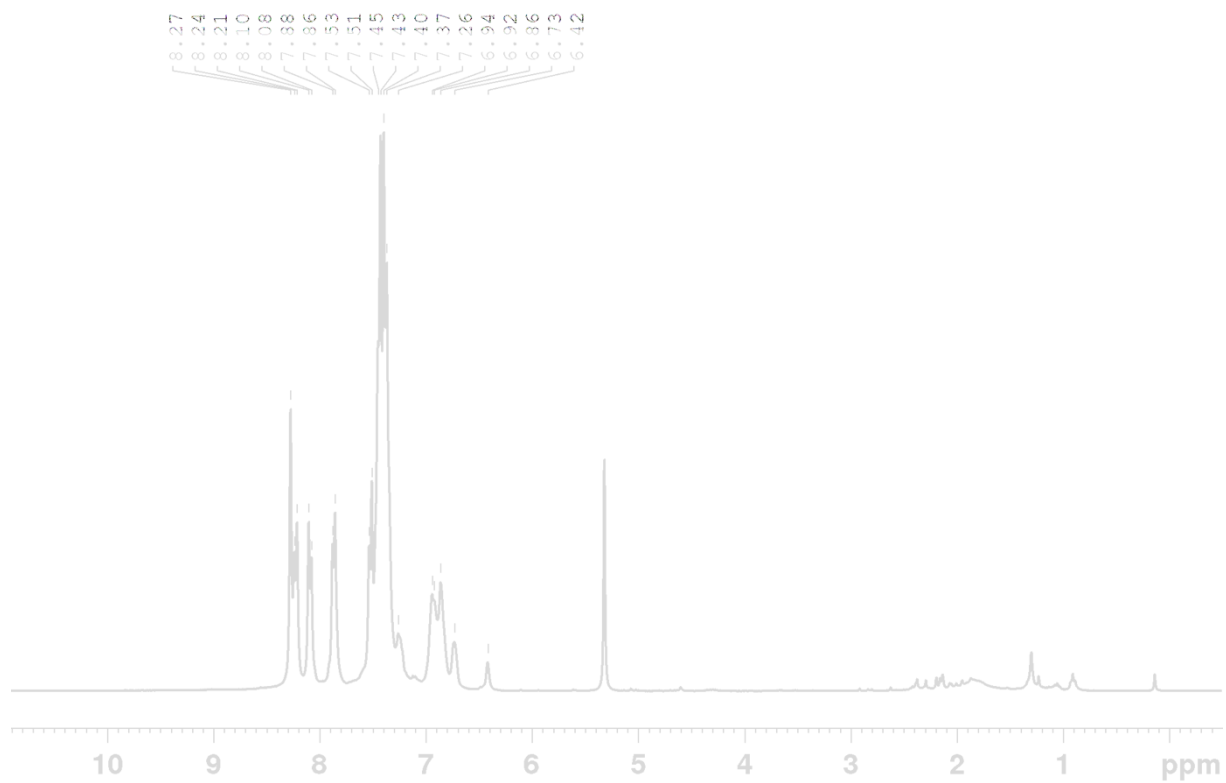

Figure ESI 34: <sup>1</sup>H-NMR of PI-4 in CD<sub>2</sub>Cl<sub>2</sub>

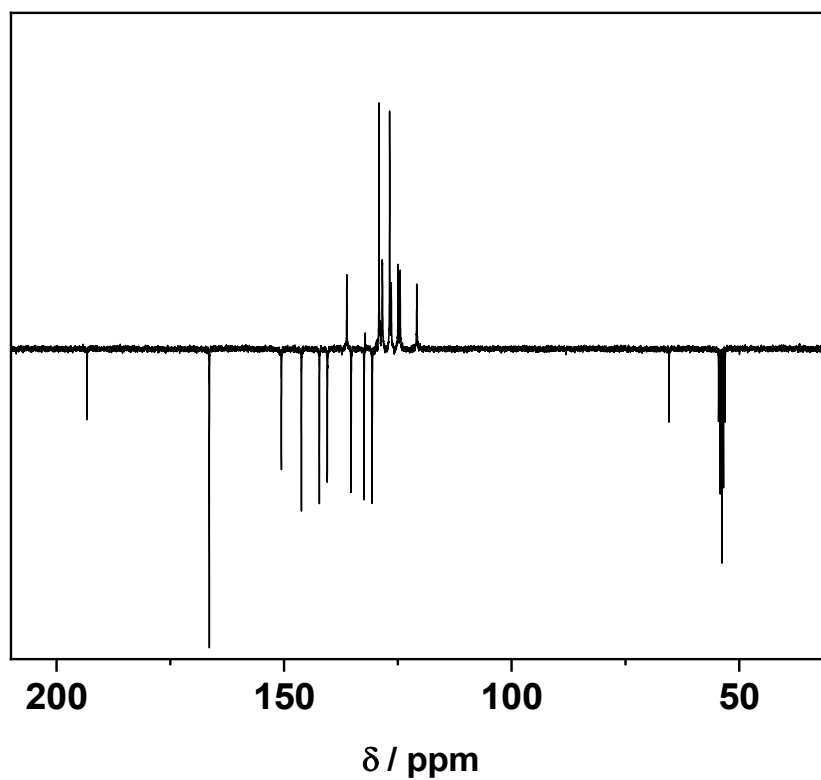

Figure ESI 35:  $^{13}\text{C}$ -NMR of PI-4 in  $\text{CD}_2\text{Cl}_2$

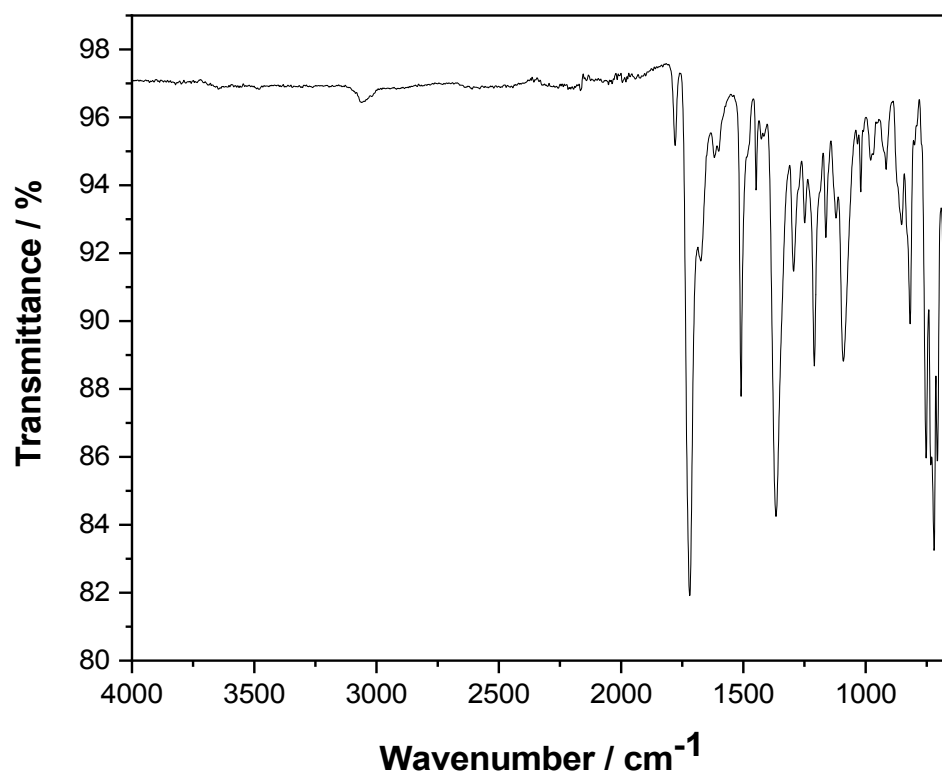

Figure ESI 36: FTIR-ATR of PI-4

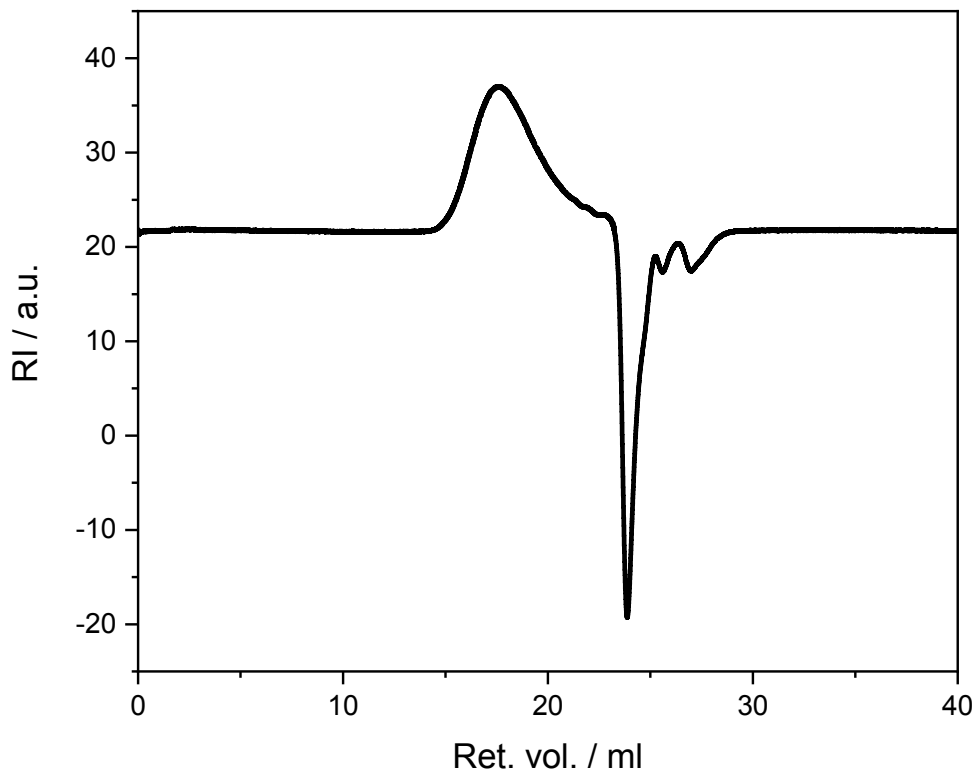

Figure ESI 37: Refractive index detector response of SEC of **PI-4**

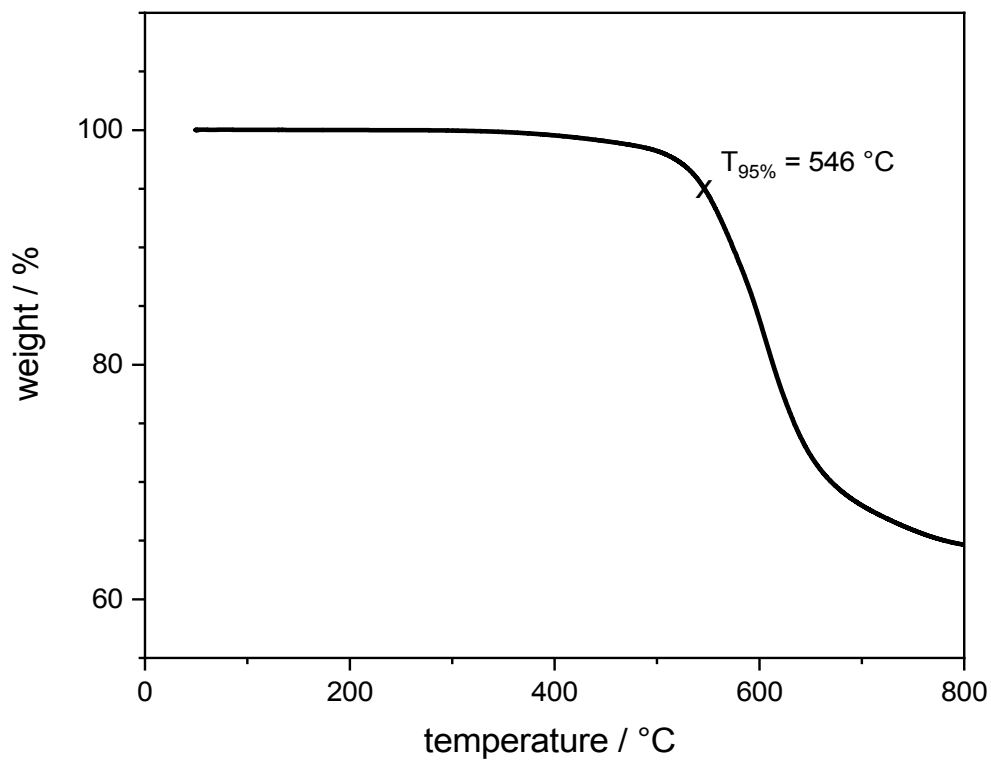

Figure ESI 38: TGA curve of **PI-4** (heating rate 10 °C/min)

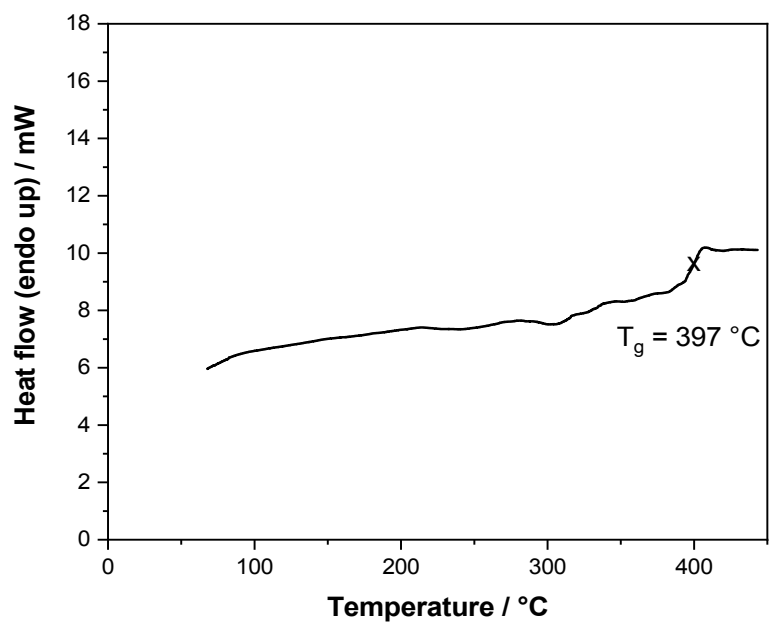

Figure ESI 39: DSC measurement of **PI-4** (second heating cycle, endo up)

PI-5

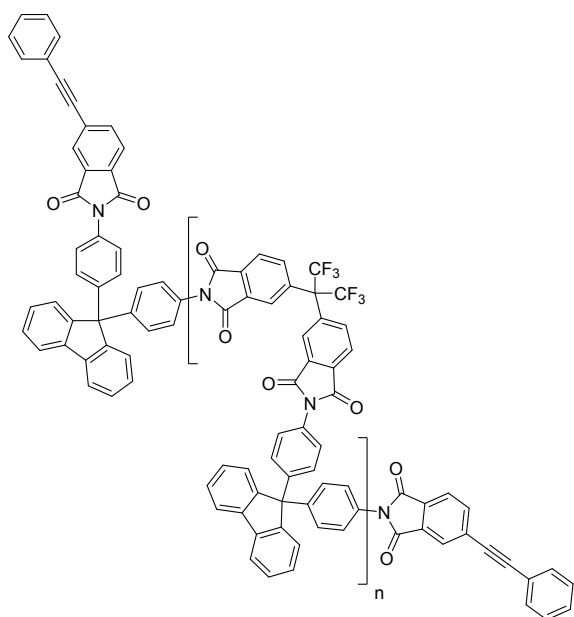

Figure ESI 40: Structure of PI-5

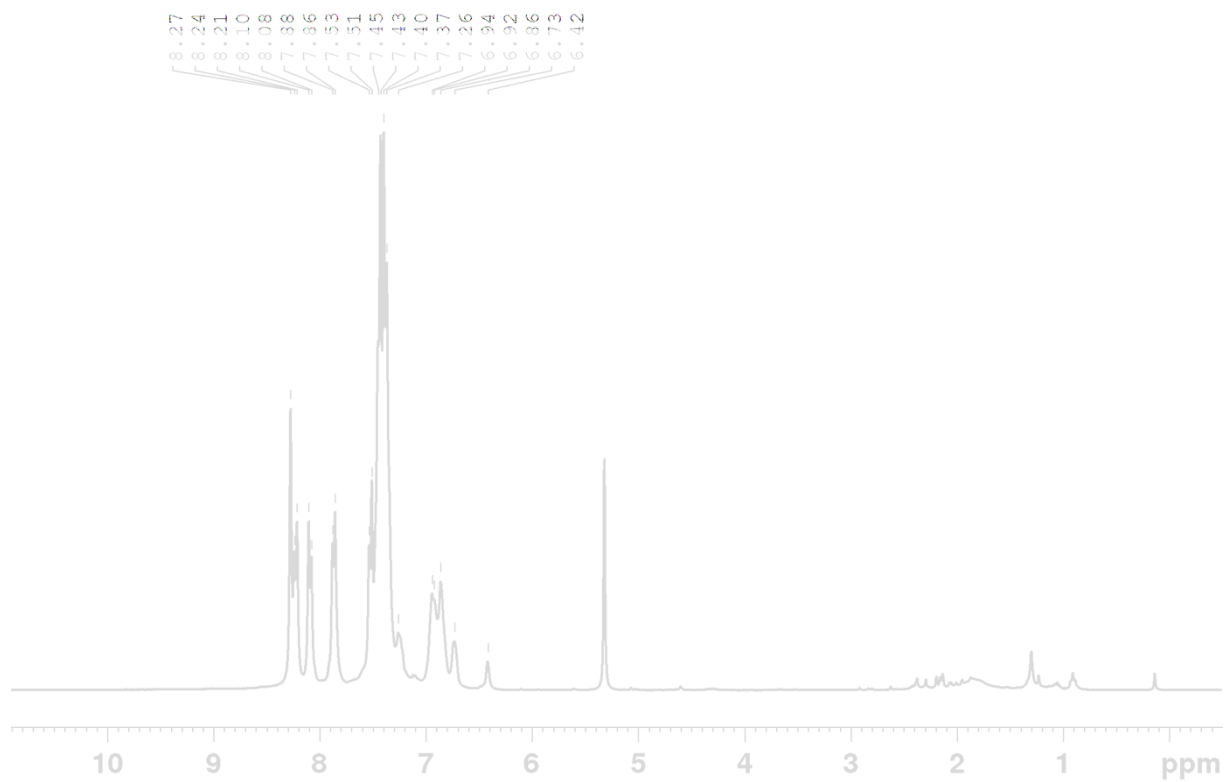

Figure ESI 41: <sup>1</sup>H-NMR of PI-5 in CD<sub>2</sub>Cl<sub>2</sub>



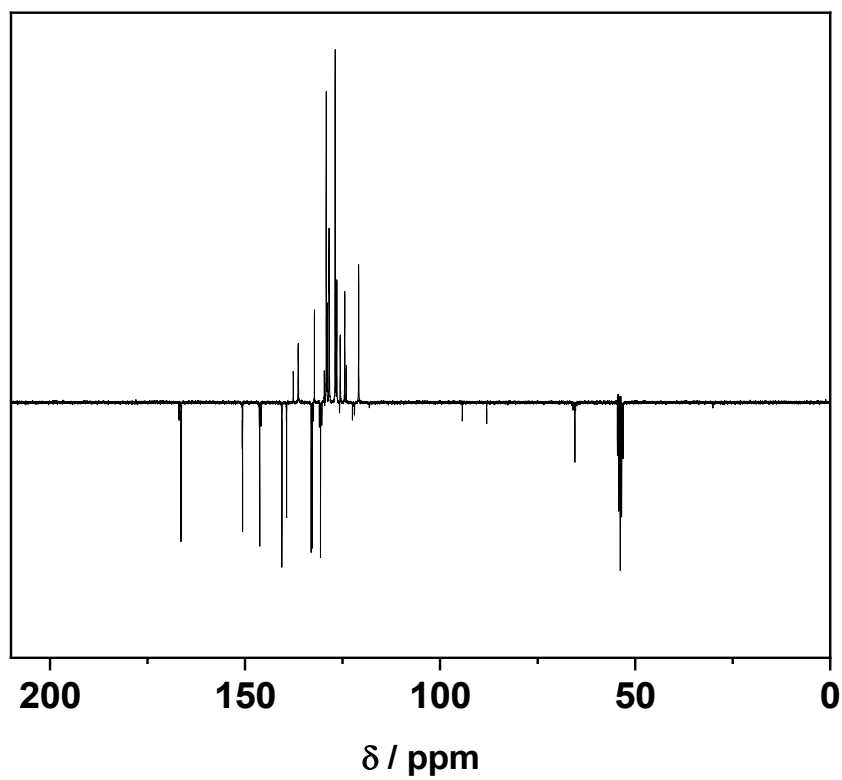

Figure ESI 42:  $^{13}\text{C}$ -NMR of PI-5 in  $\text{CD}_2\text{Cl}_2$

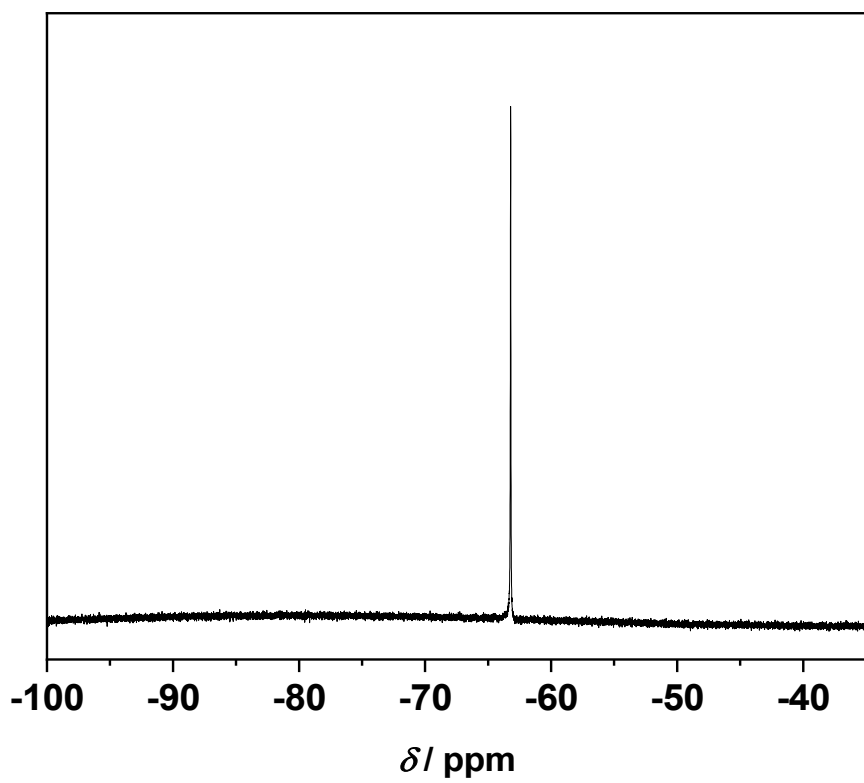

Figure ESI 43:  $^{19}\text{F}$ -NMR of PI-5 in  $\text{CDCl}_3$

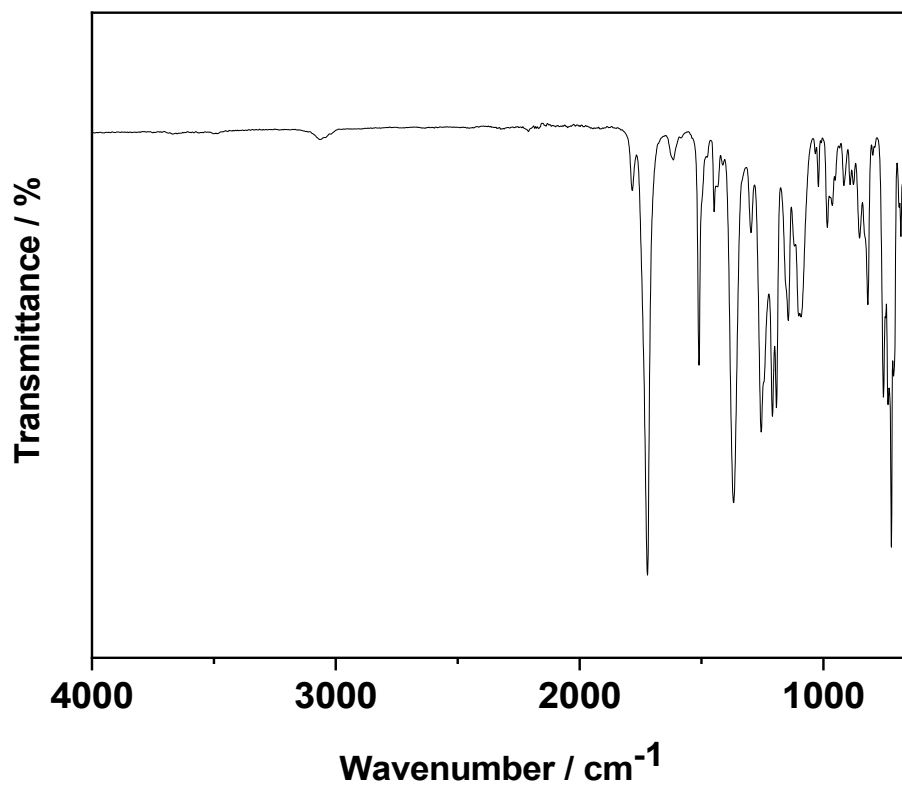

Figure ESI 44: FTIR-ATR of PI-5

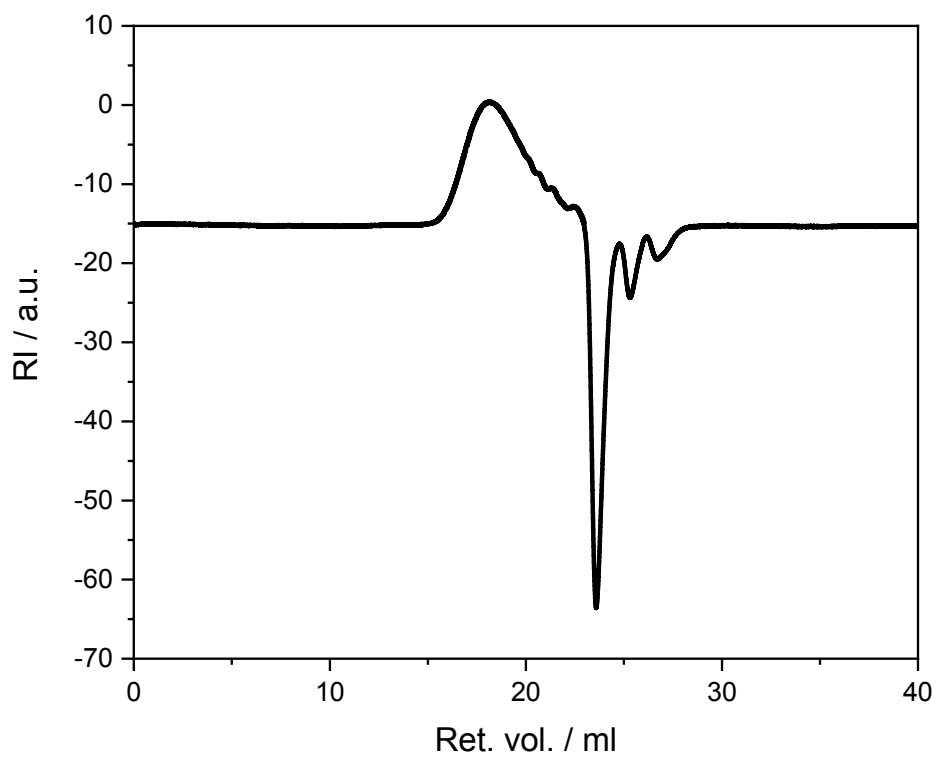

Figure ESI 45: Refractive index detector response of SEC of PI-5

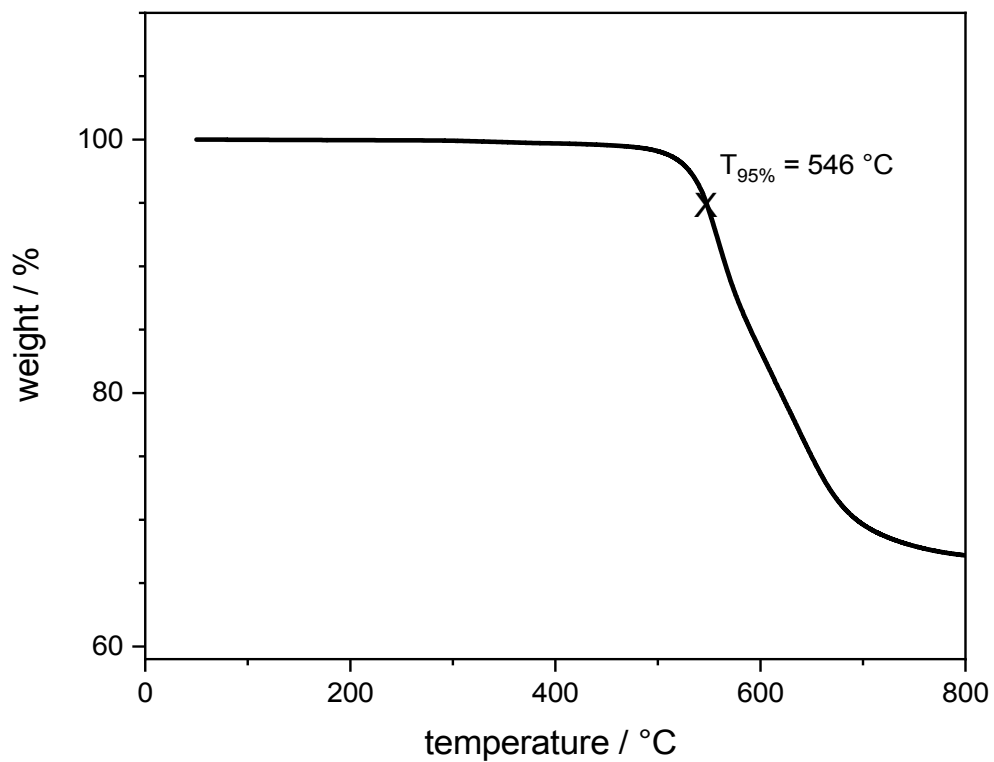

Figure ESI 46: TGA curve of **PI-5** (heating rate 10 °C/min)

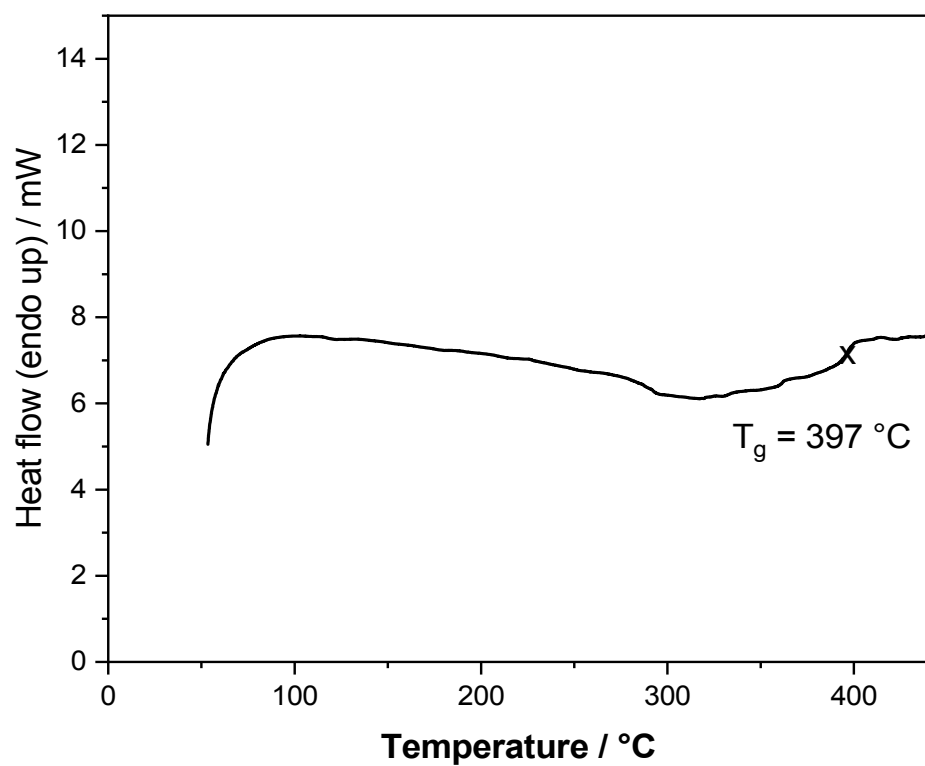

Figure ESI 47: DSC measurement of **PI-5** (second heating cycle, endo up)

PI-6

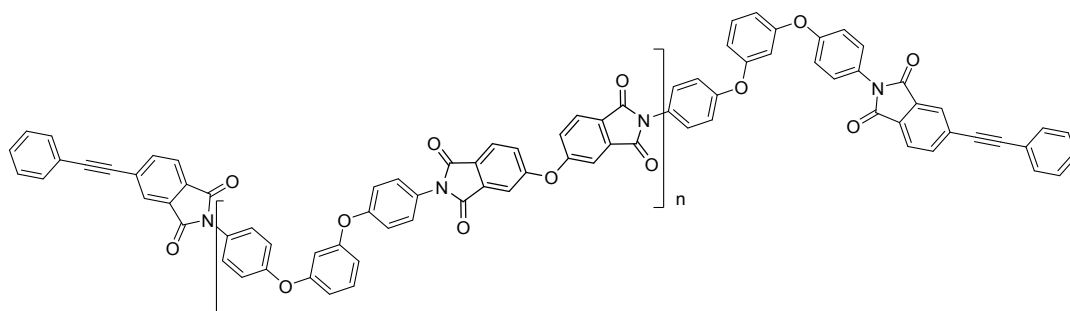

Figure ESI 48: Structure of PI-6

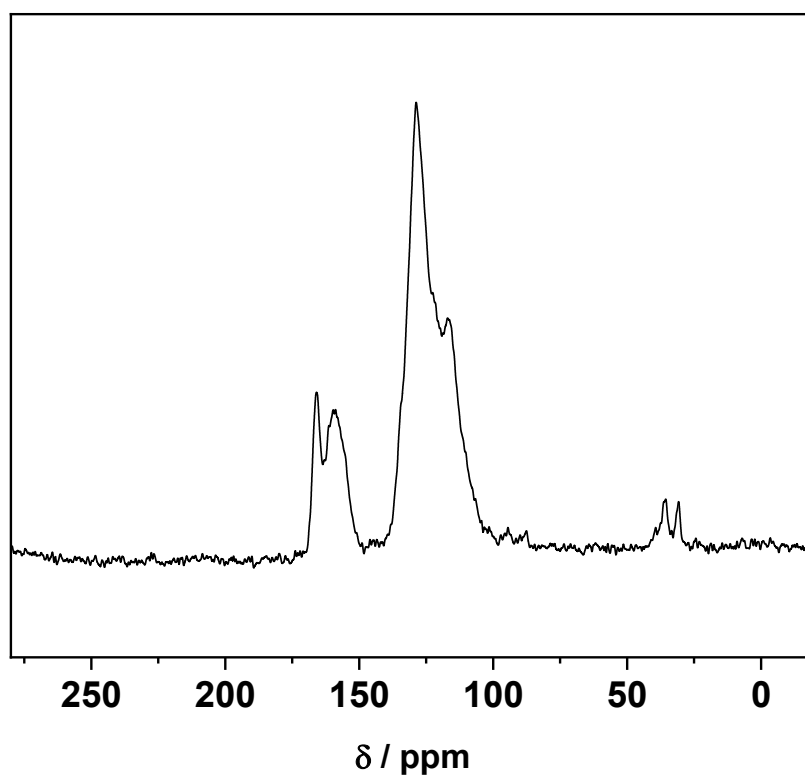

Figure ESI 49: Solid state  $^{13}\text{C}$ -NMR of PI-6

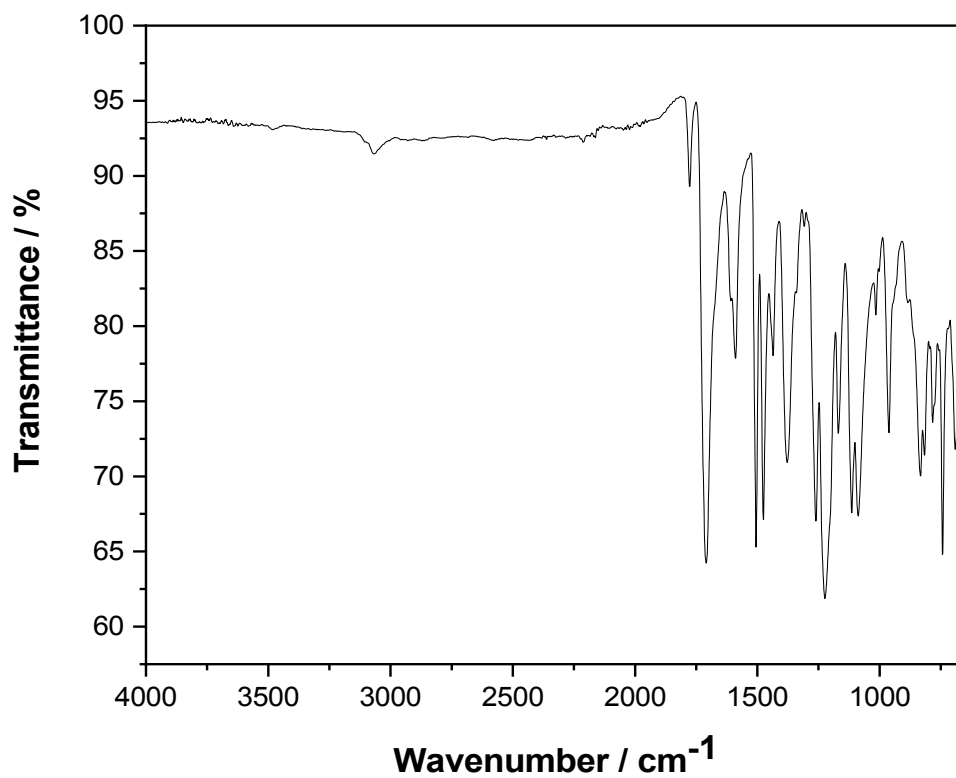

Figure ESI 50: FTIR-ATR of PI-6

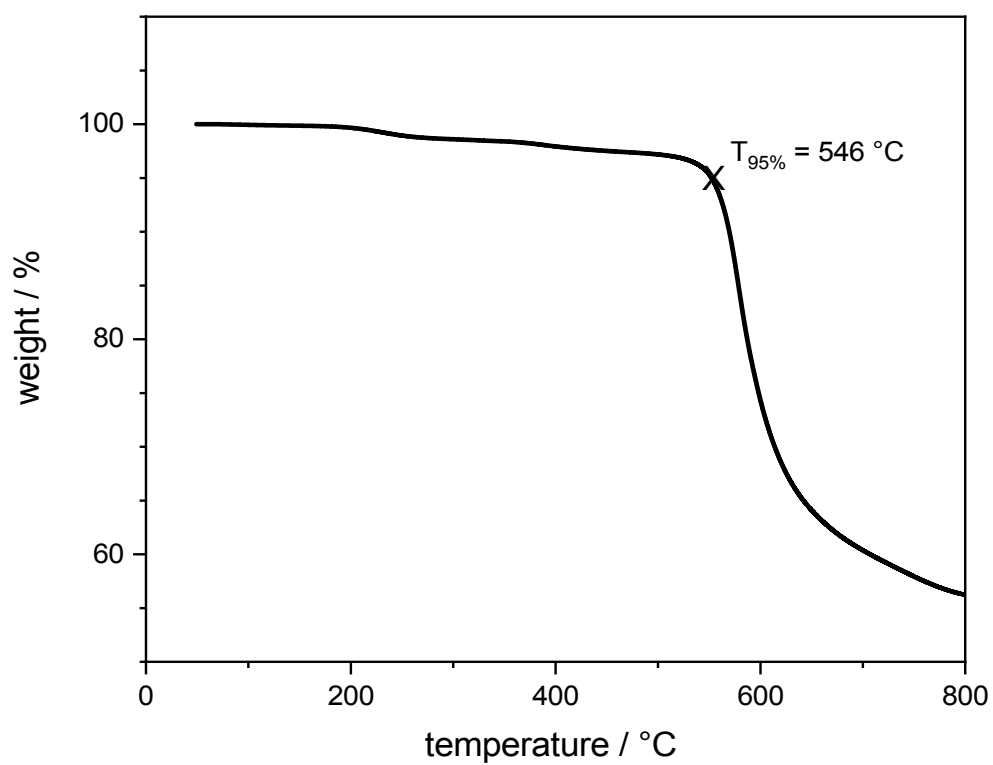

Figure ESI 51: TGA curve of PI-6 (heating rate 10 °C/min)

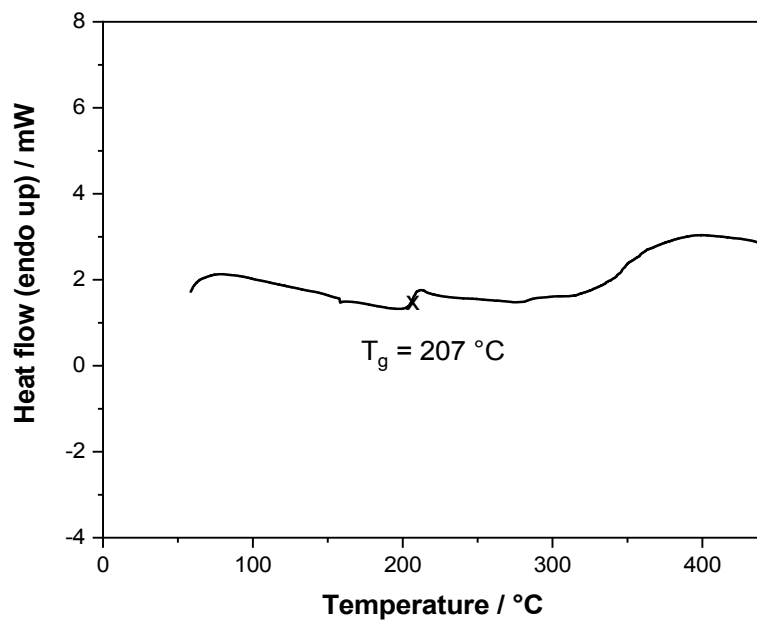

Figure ESI 52: DSC measurement of **PI-6** (second heating cycle, endo up)

# PI-7

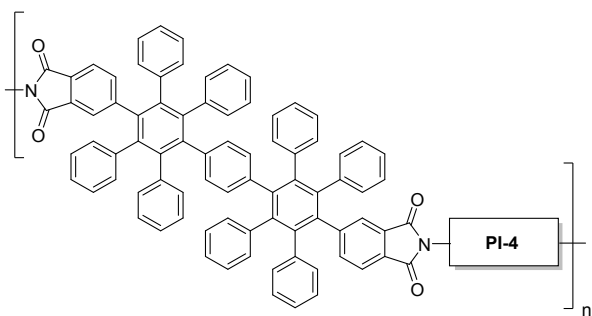

Figure ESI 53: Structure of **PI-7**

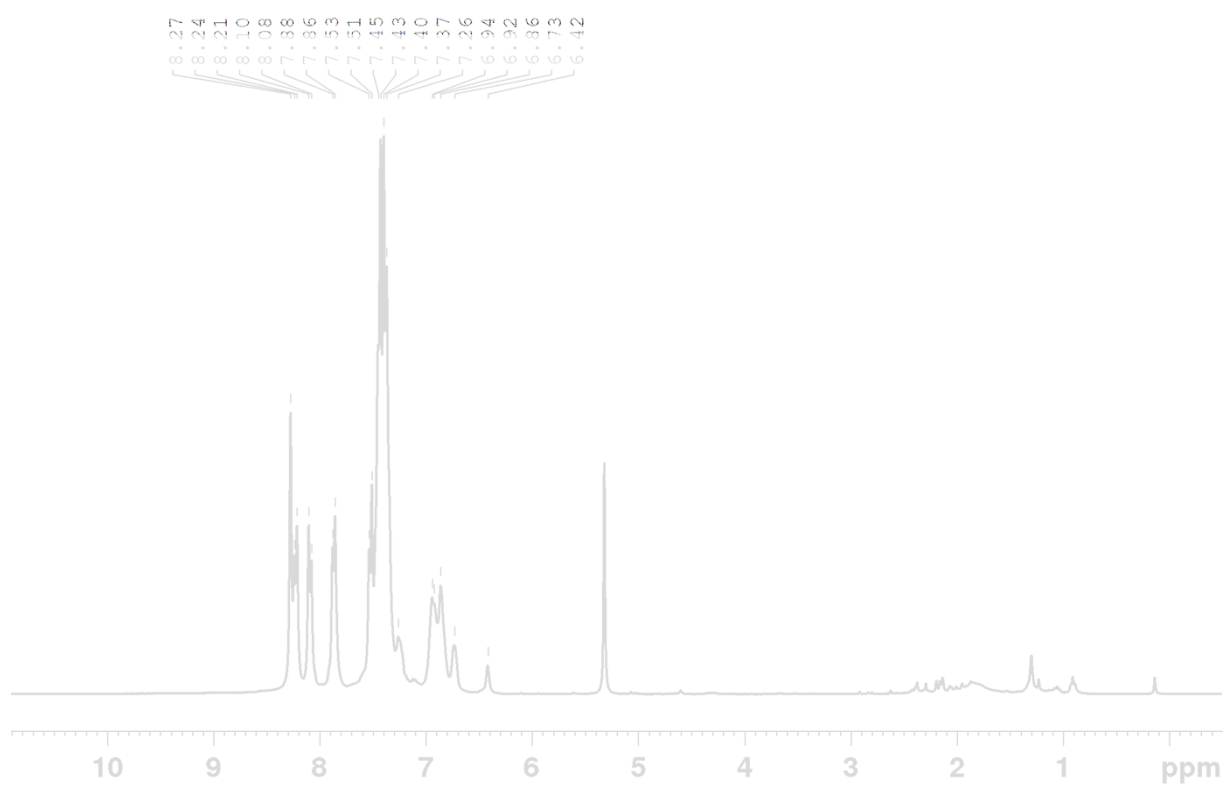

Figure ESI 54: <sup>1</sup>H-NMR of **PI-7** in CD<sub>2</sub>Cl<sub>2</sub>

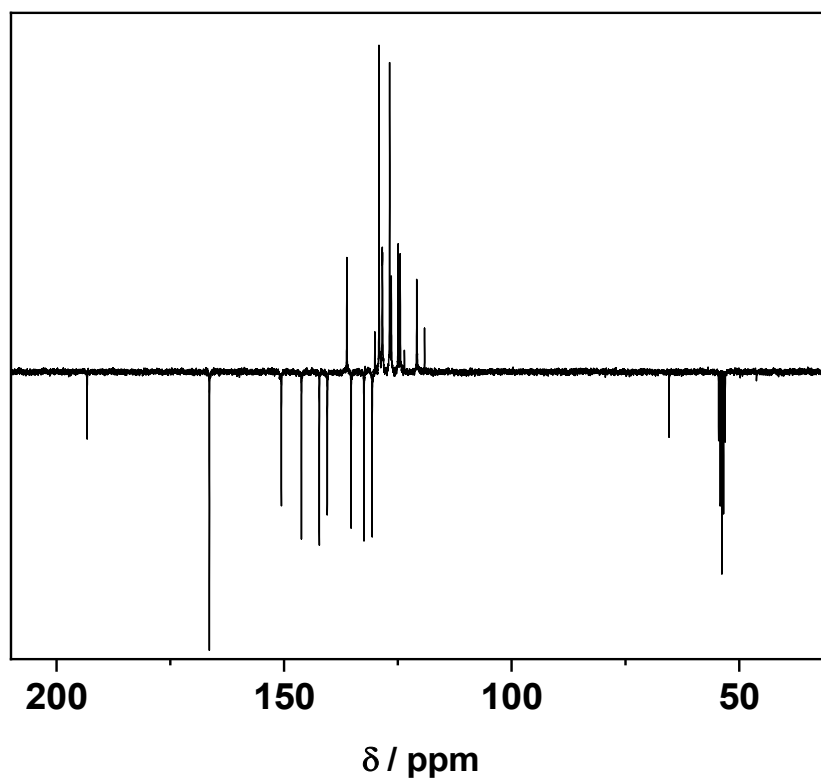

Figure ESI 55:  $^{13}\text{C}$ -NMR of PI-7 in  $\text{CD}_2\text{Cl}_2$

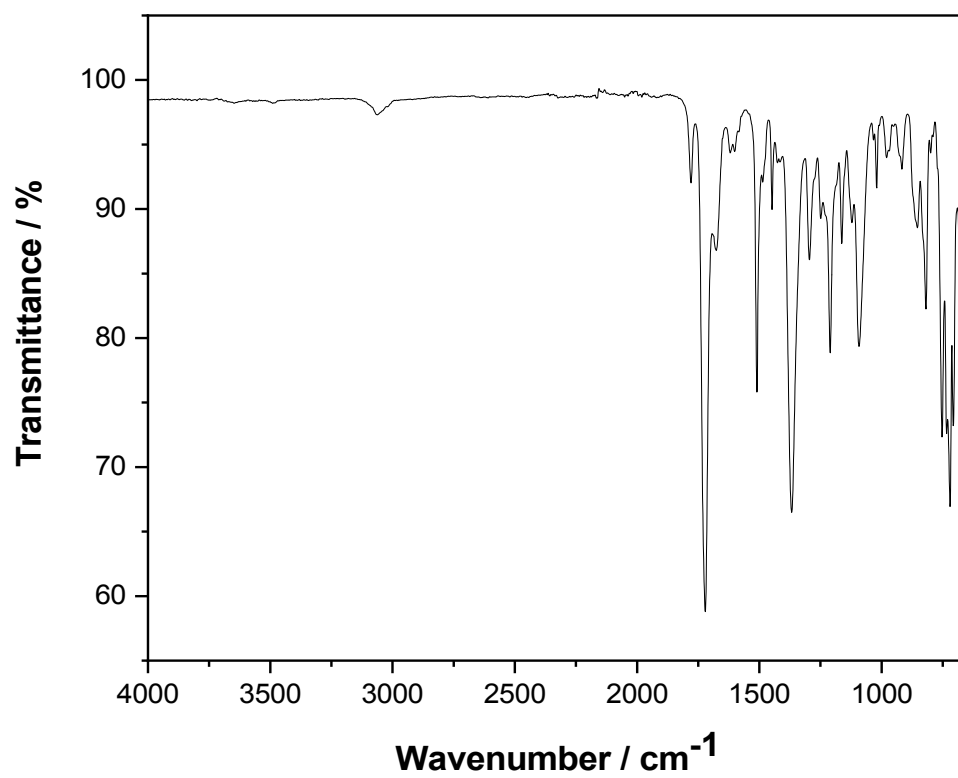

Figure ESI 56: FTIR-ATR of PI-7



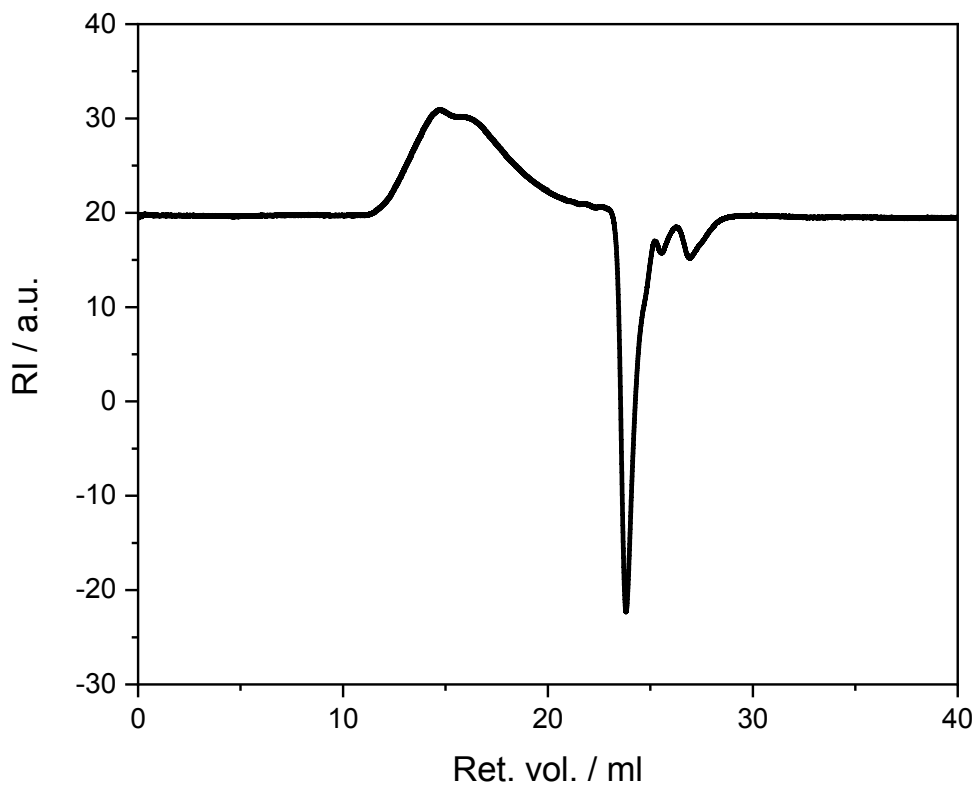

Figure ESI 57: Refractive index detector response of SEC of PI-7

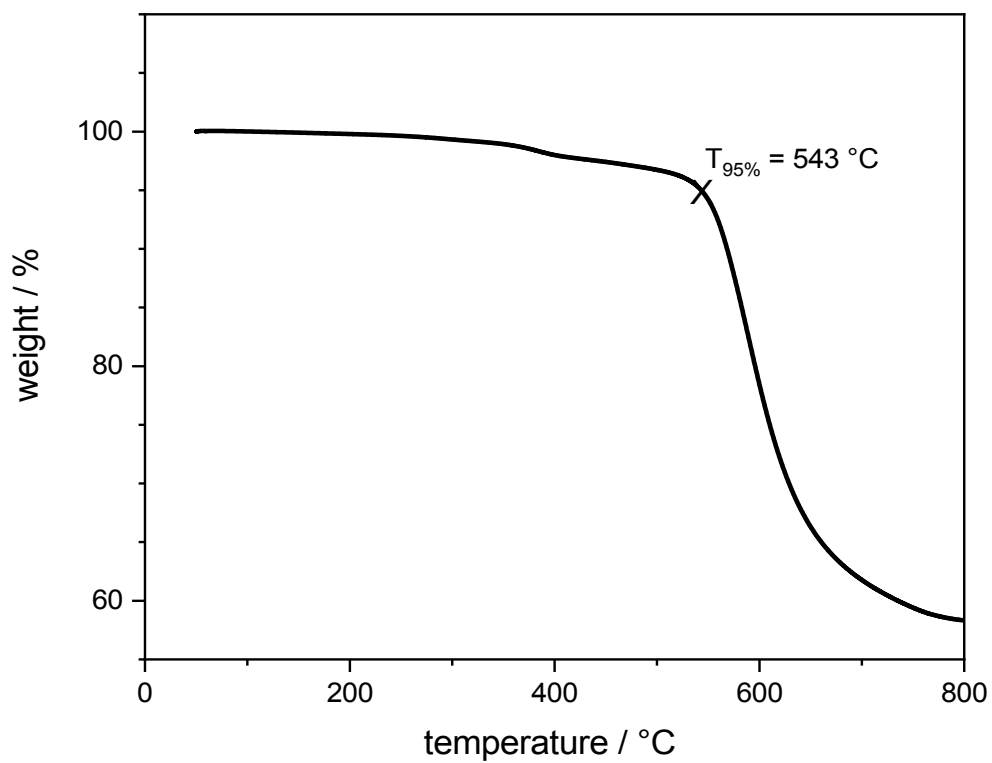

Figure ESI 58: TGA curve of PI-7 (heating rate 10 °C/min)

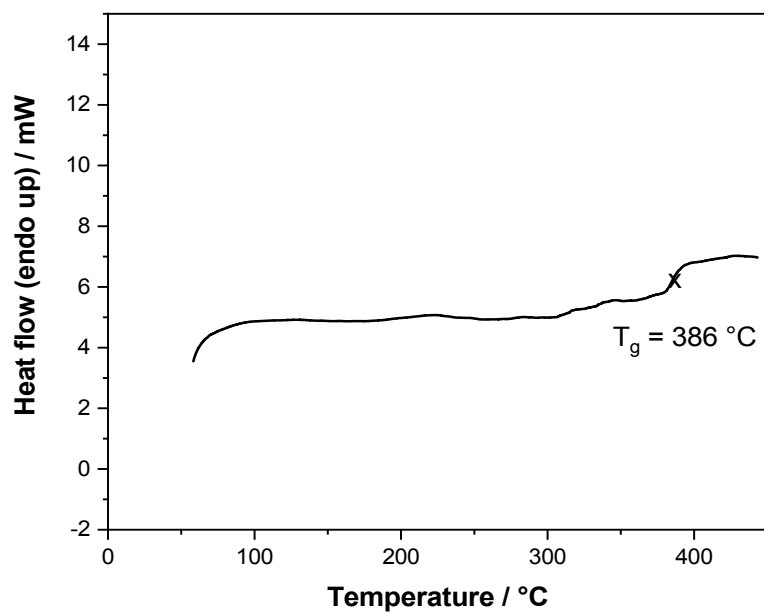

Figure ESI 59: DSC measurement of PI-7(second heating cycle, endo up)

# PI-8

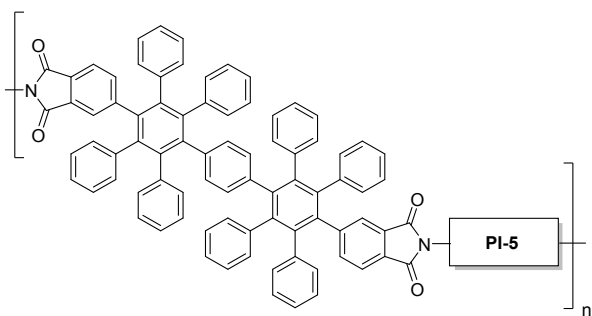

Figure ESI 60: Structure of **PI-8**

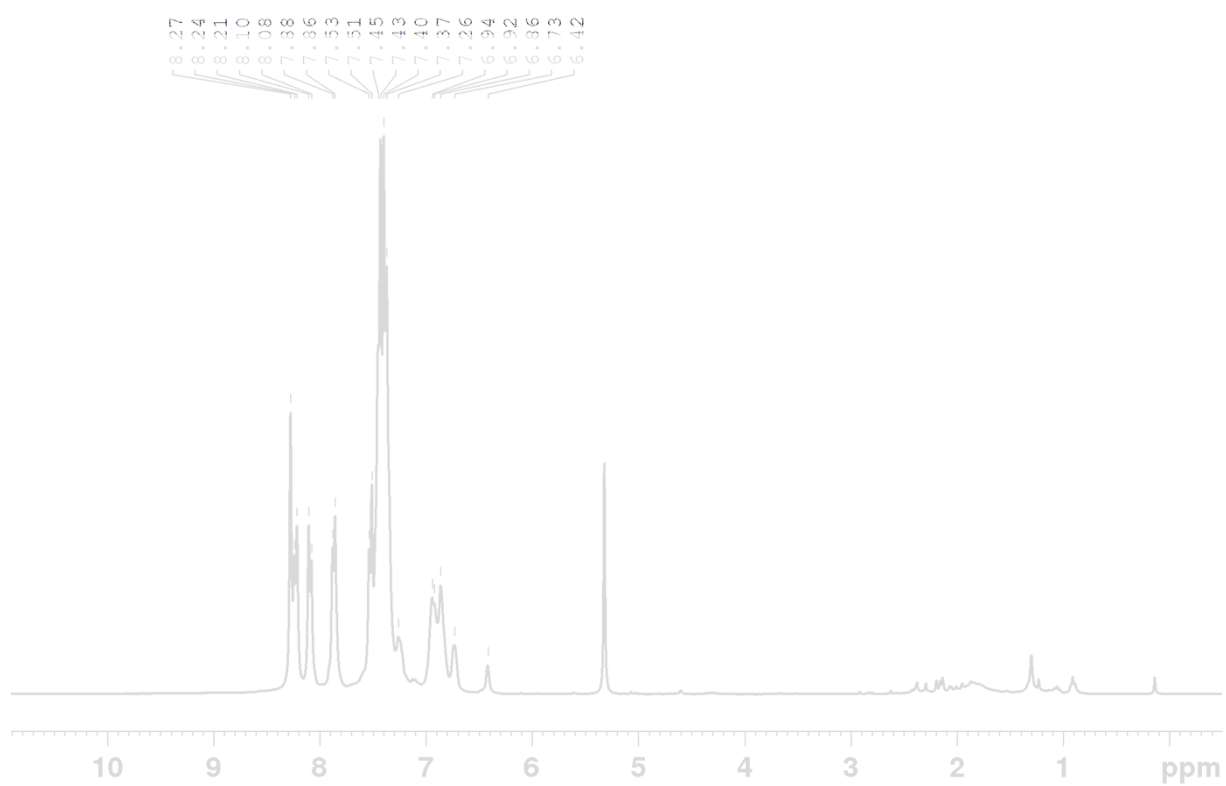

Figure ESI 61: <sup>1</sup>H-NMR of **PI-8** in CD<sub>2</sub>Cl<sub>2</sub>

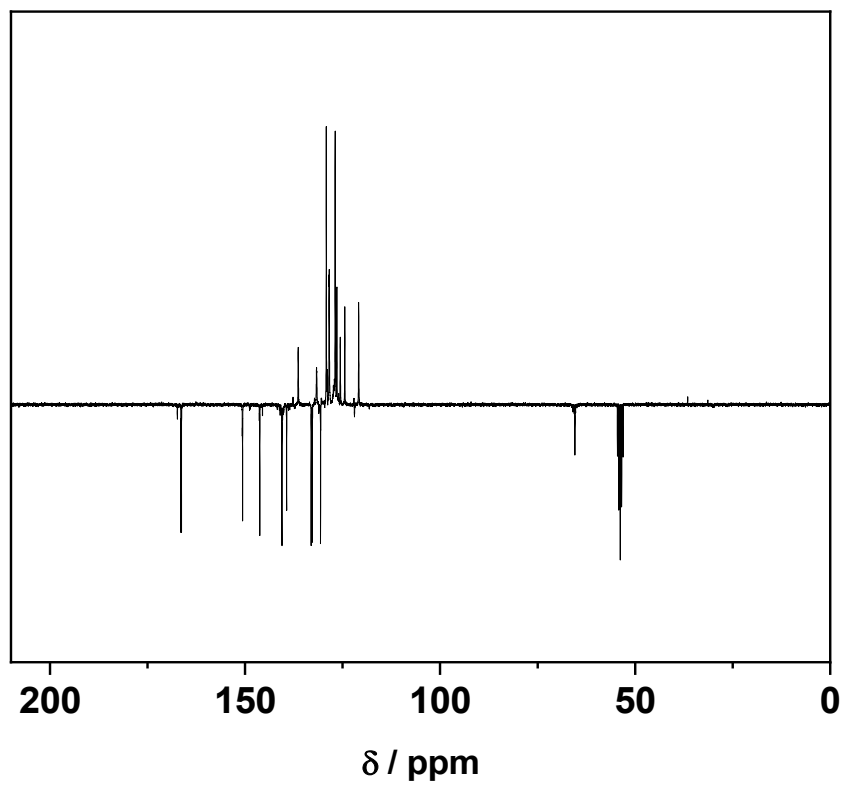

Figure ESI 62:  $^{13}\text{C}$ -NMR of **PI-8** in  $\text{CD}_2\text{Cl}_2$

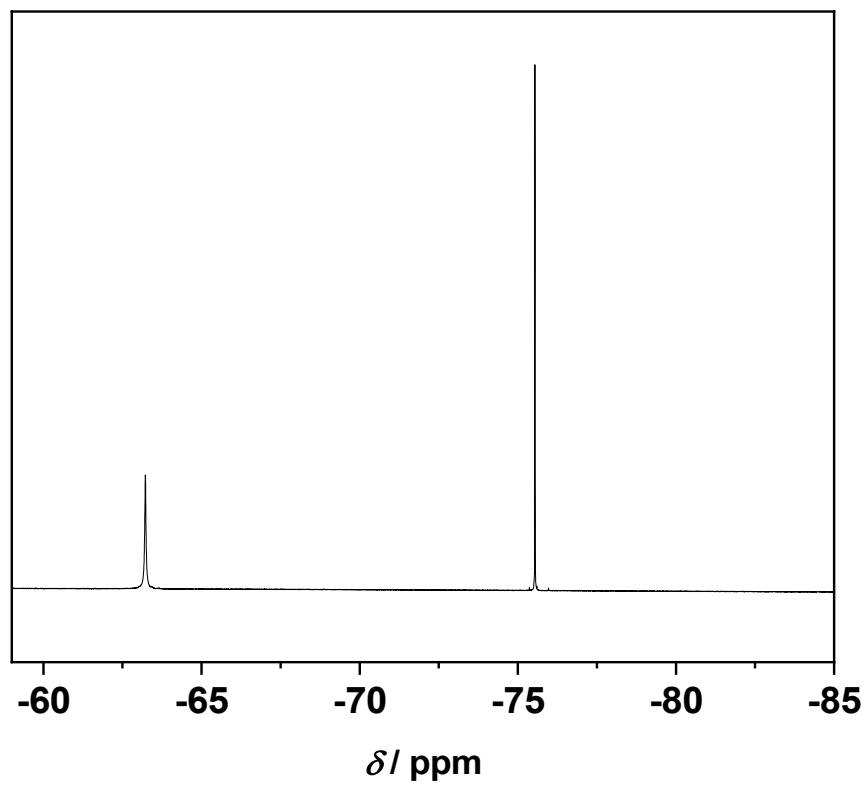

Figure ESI 63:  $^{19}\text{F}$  NMR of **PI-8** in  $\text{CDCl}_3$  (peak at -75.5 ppm originates from TFA used as internal standard)

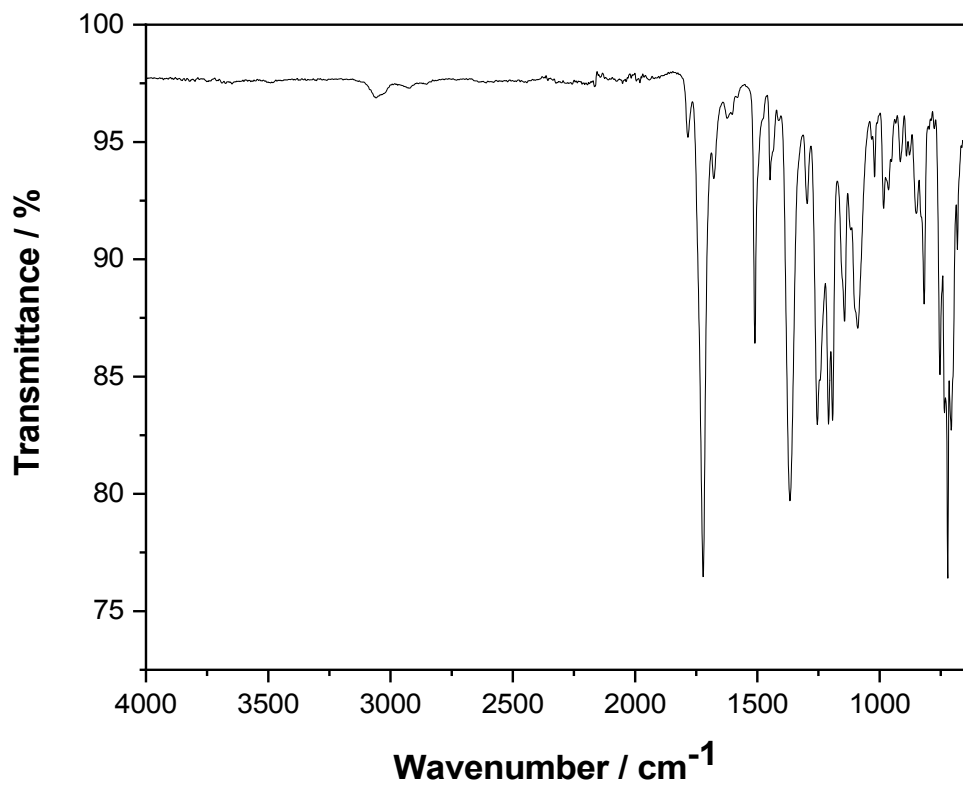

Figure ESI 64: FTIR-ATR of PI-8

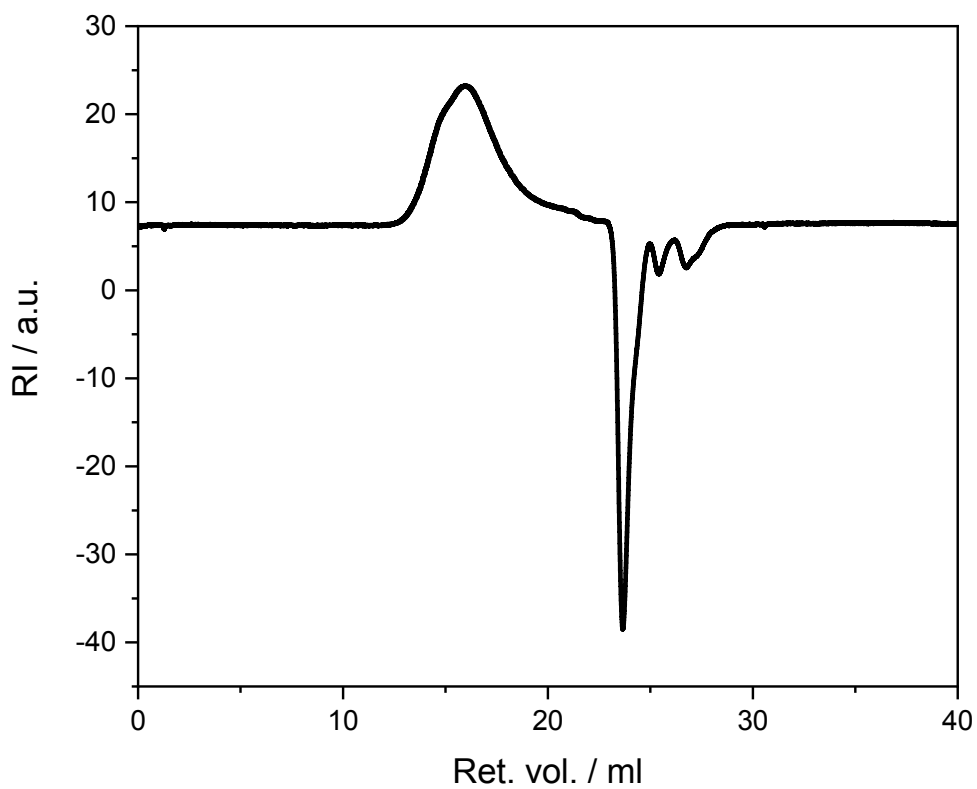

Figure ESI 65: Refractive index detector response of SEC of PI-8

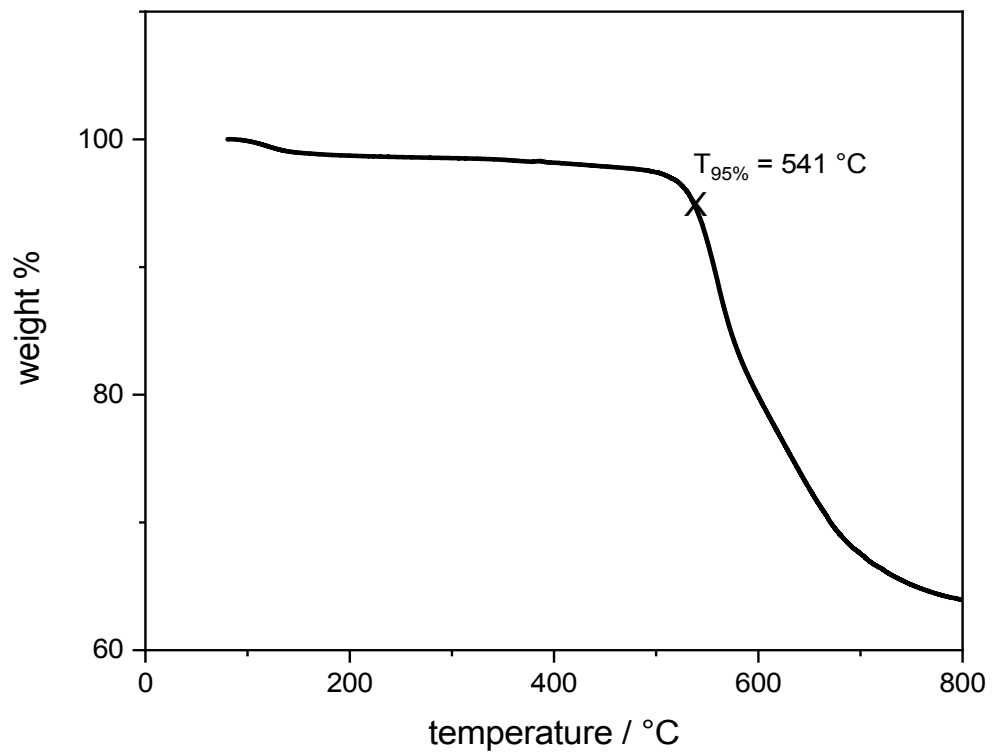

Figure ESI 66: TGA curve of **PI-8** (heating rate 10 °C/min)

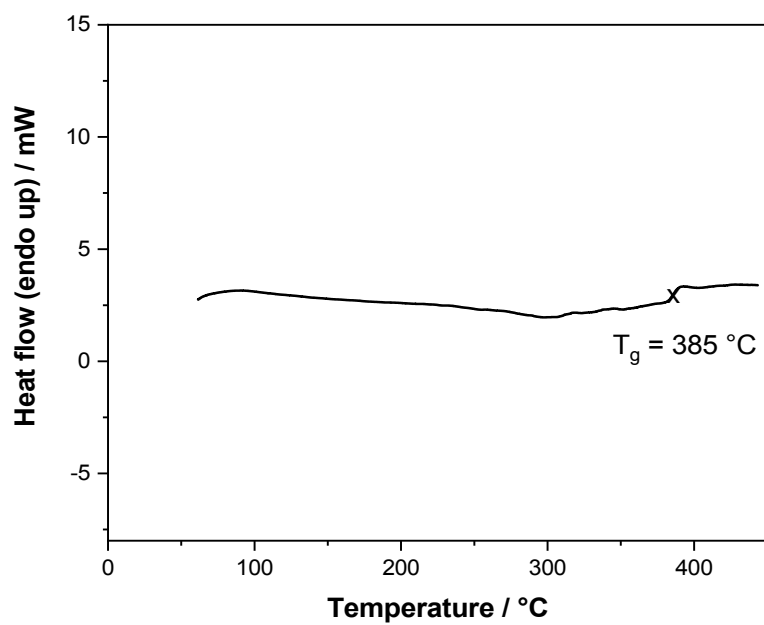

Figure ESI 67: DSC measurement of **PI-7**(second heating cycle, endo up)

PI-9

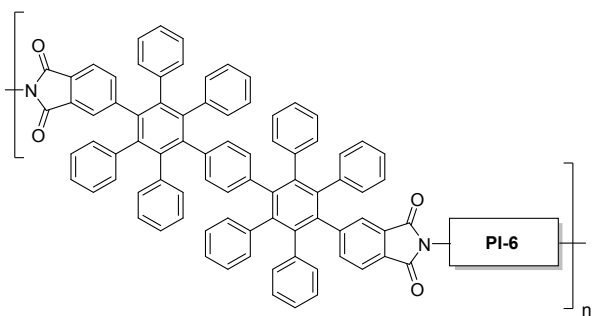

Figure ESI 68: Structure of **PI-9**

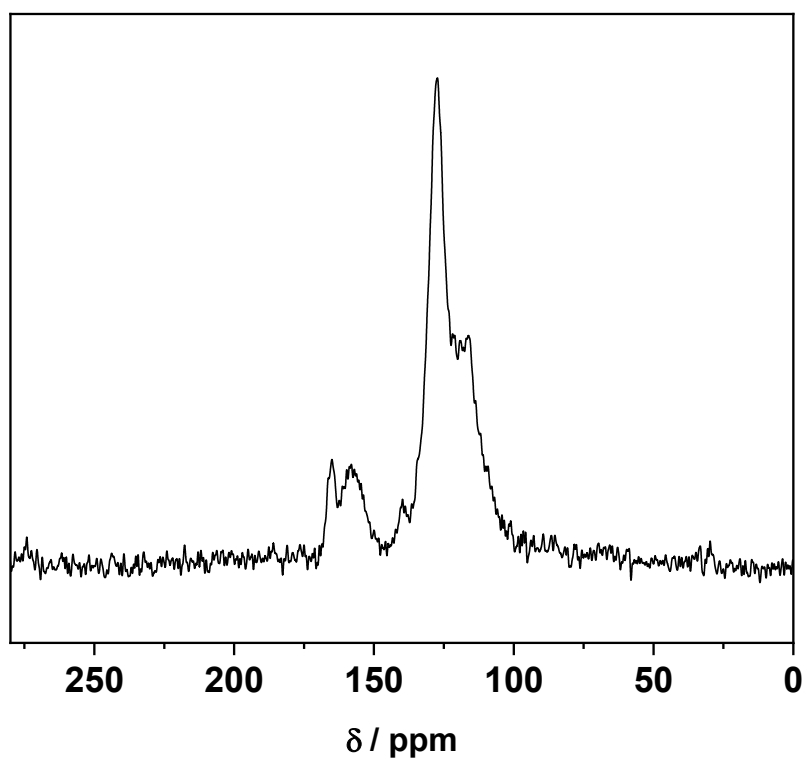

Figure ESI 69: Solid state  $^{13}\text{C}$ -NMR of **PI-9**

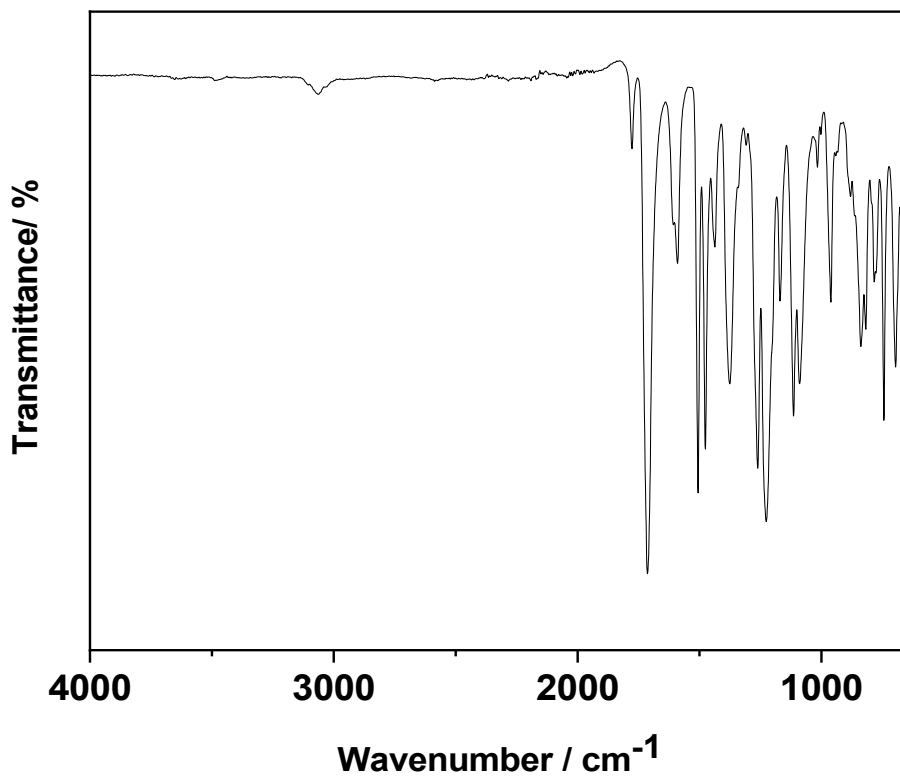

Figure ESI 70: FTIR-ATR of PI-9

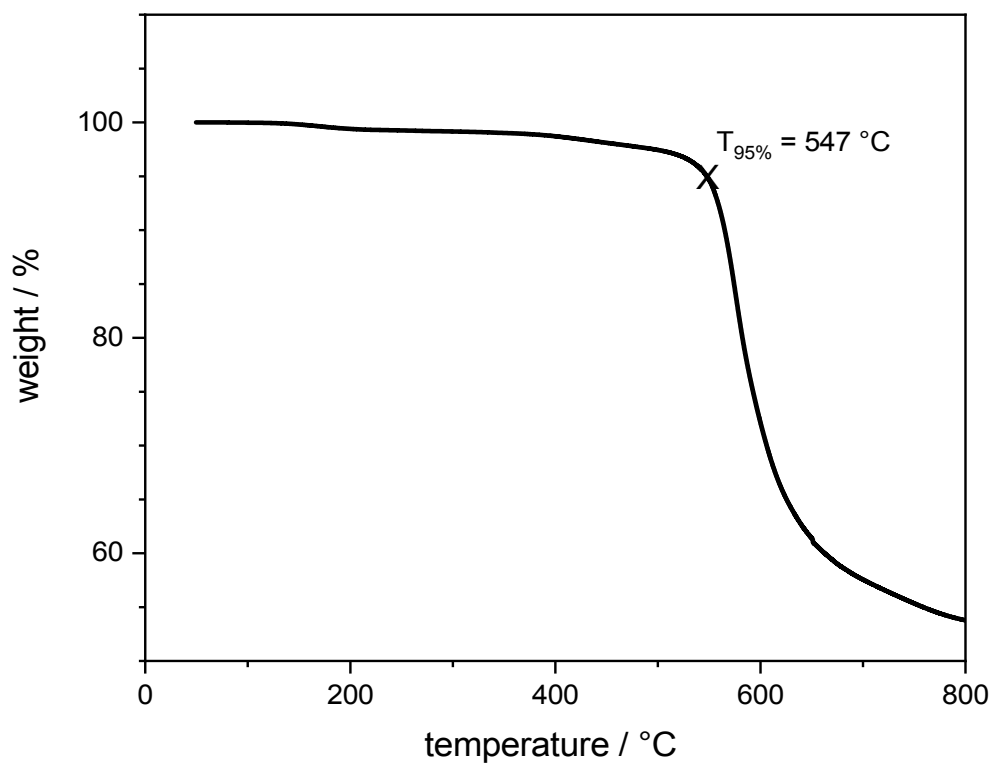

Figure ESI 71: TGA curve of PI-9 (heating rate 10 °C/min)



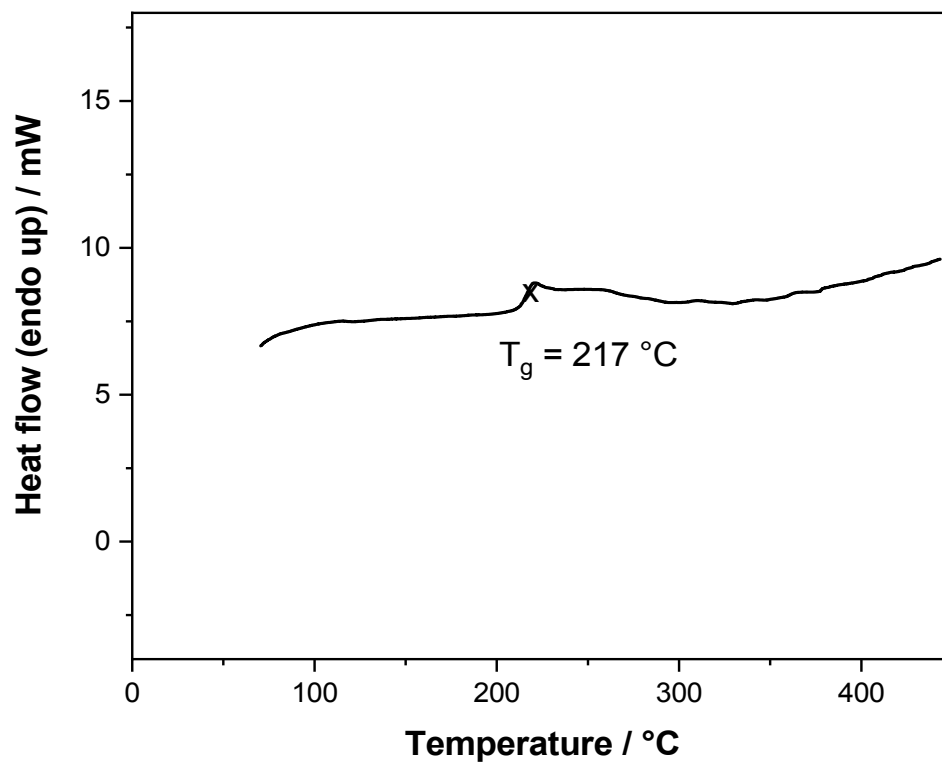

Figure ESI 72: DSC measurement of **PI-9** (second heating cycle, endo up)

# PI-10

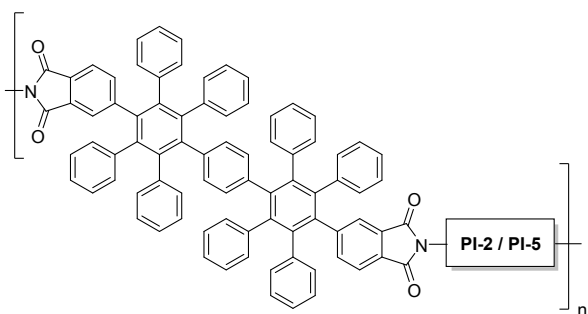

Figure ESI 73: Structure of PI-10

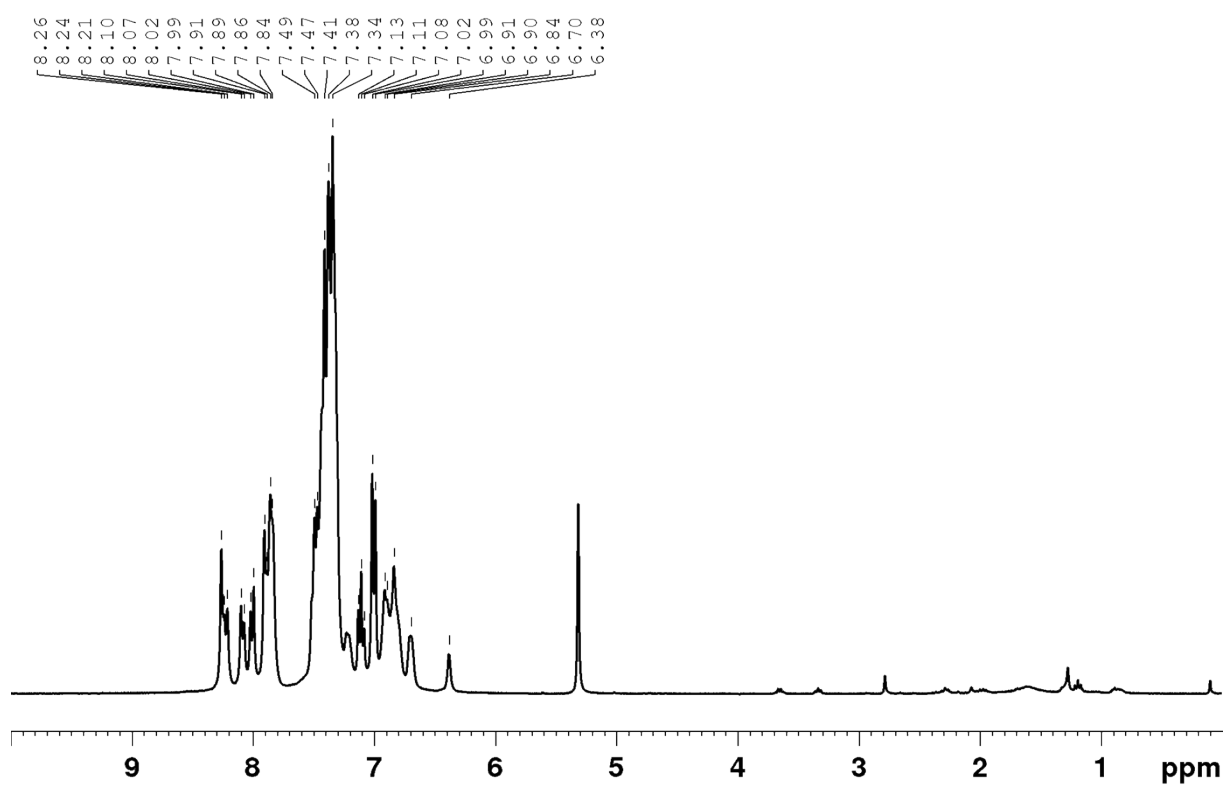

Figure ESI 74: <sup>1</sup>H-NMR of PI-10 in CD<sub>2</sub>Cl<sub>2</sub>

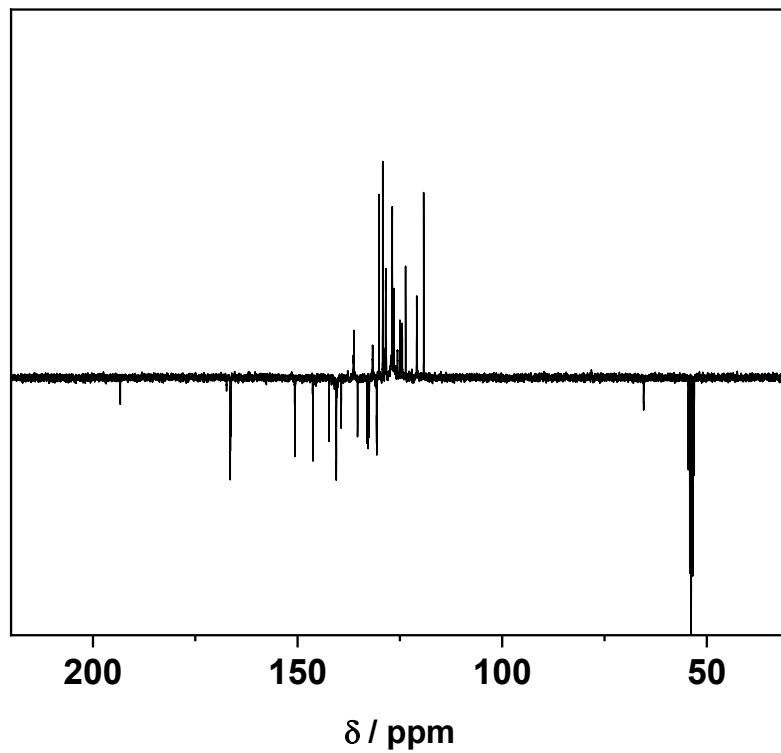

Figure ESI 75:  $^{13}\text{C}$ -NMR of **PI-10** in  $\text{CD}_2\text{Cl}_2$

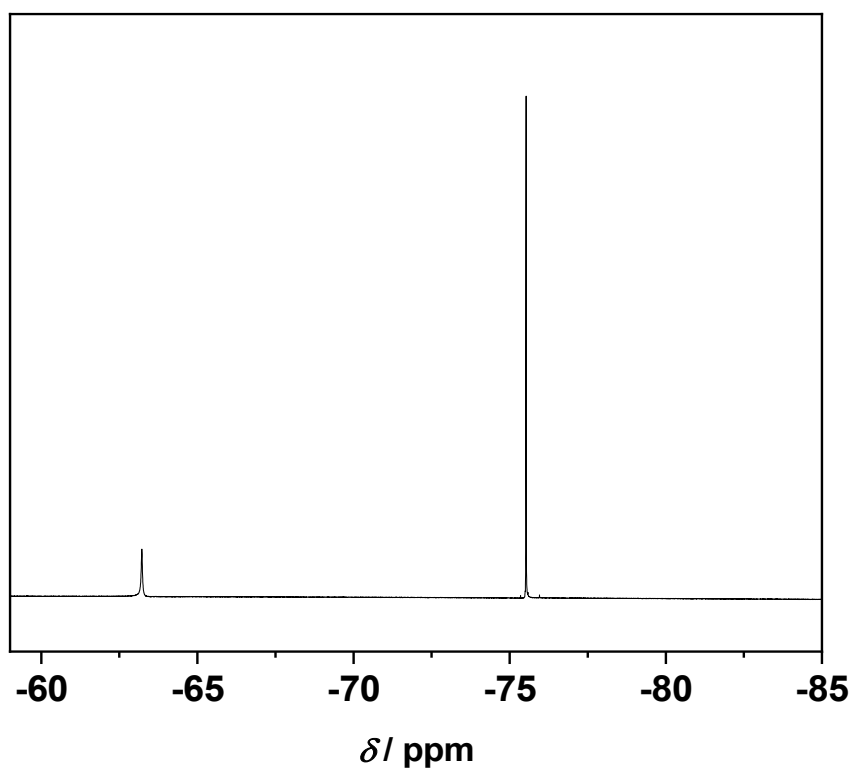

Figure ESI 76:  $^{19}\text{F}$ -NMR of **PI-10** in  $\text{CDCl}_3$  (peak at -75.5 ppm originates from TFA used as internal standard)

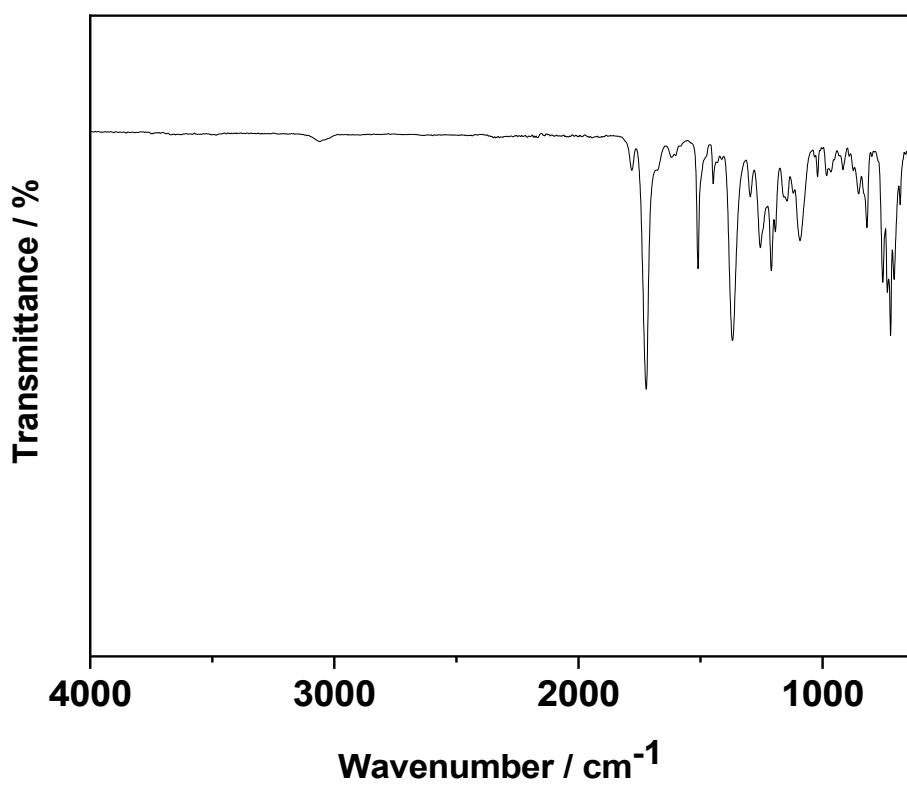

Figure ESI 77: FTIR-ATR of PI-10

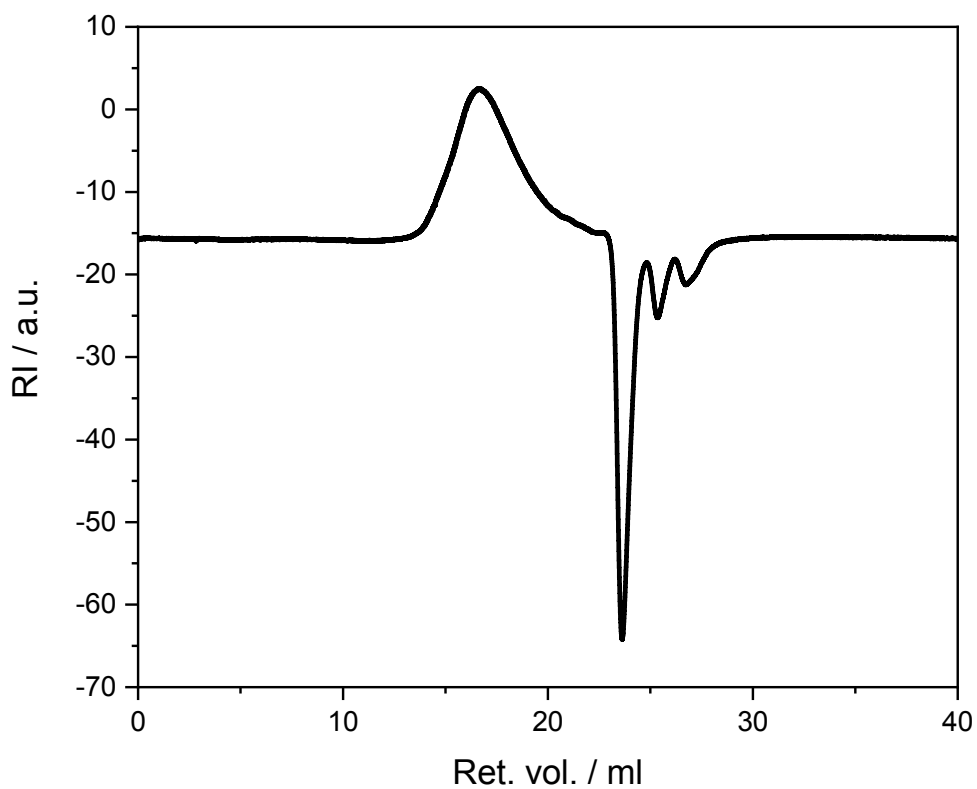

Figure ESI 78: Refractive index detector response of SEC of PI-10

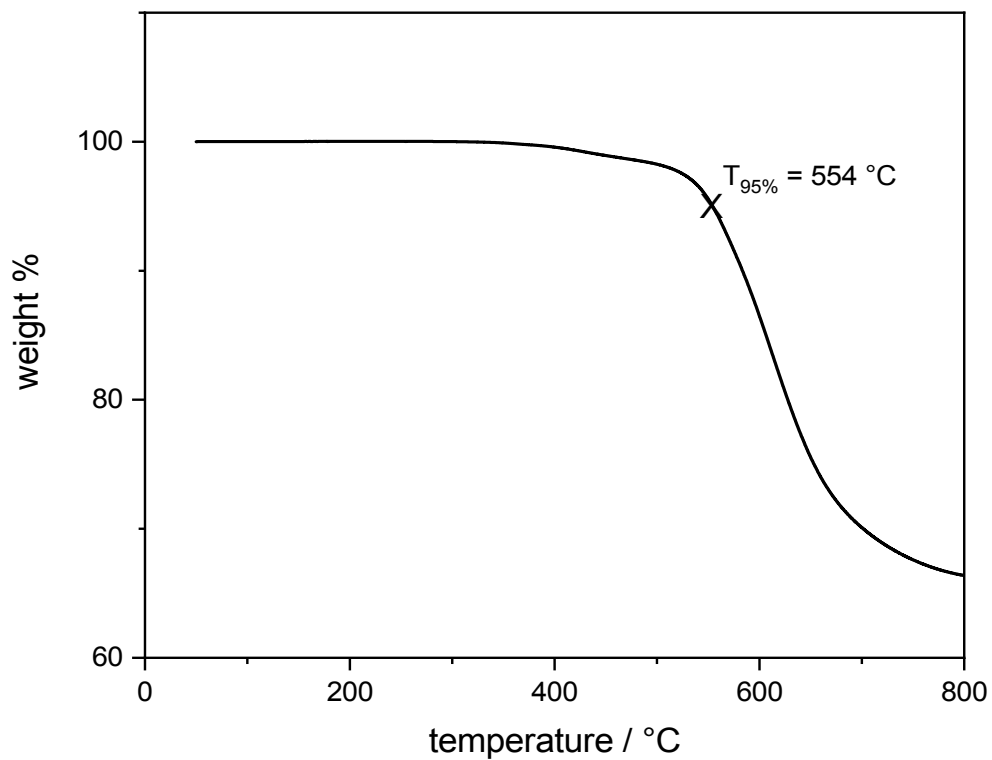

Figure ESI 79: TGA curve of **PI-10** (heating rate 10 °C/min)

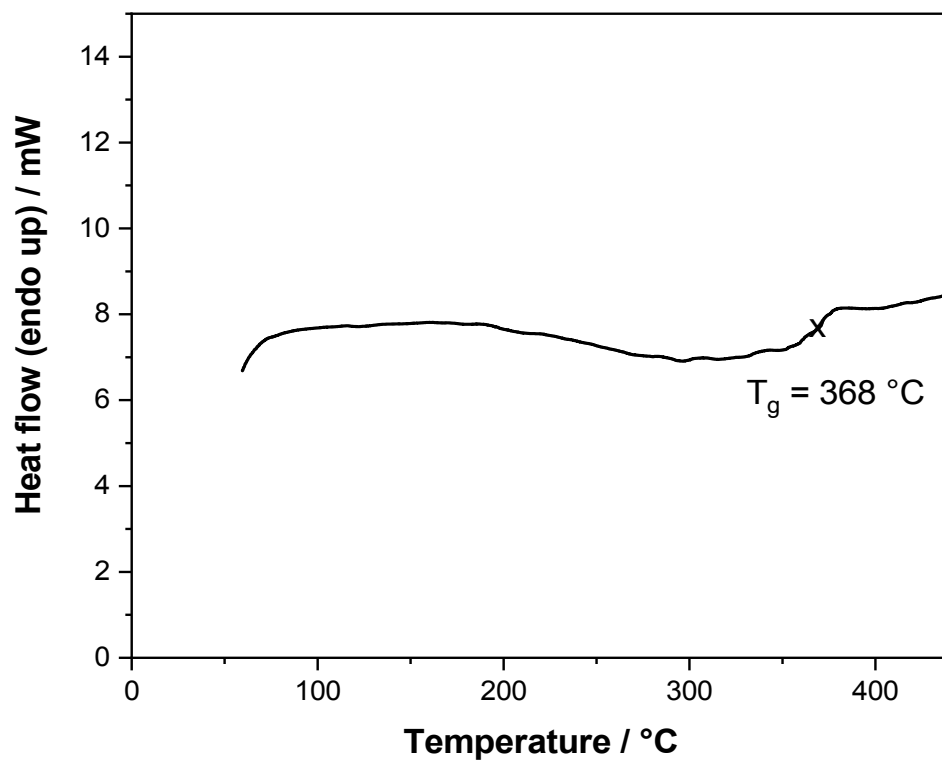

Figure ESI 80: DSC measurement of **PI-10** (second heating cycle, endo up)

PI-11

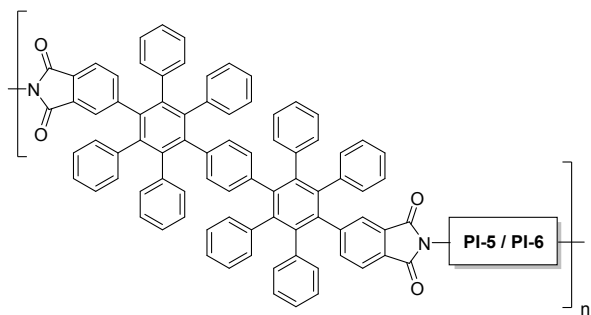

Figure ESI 81: Structure of **PI-11**

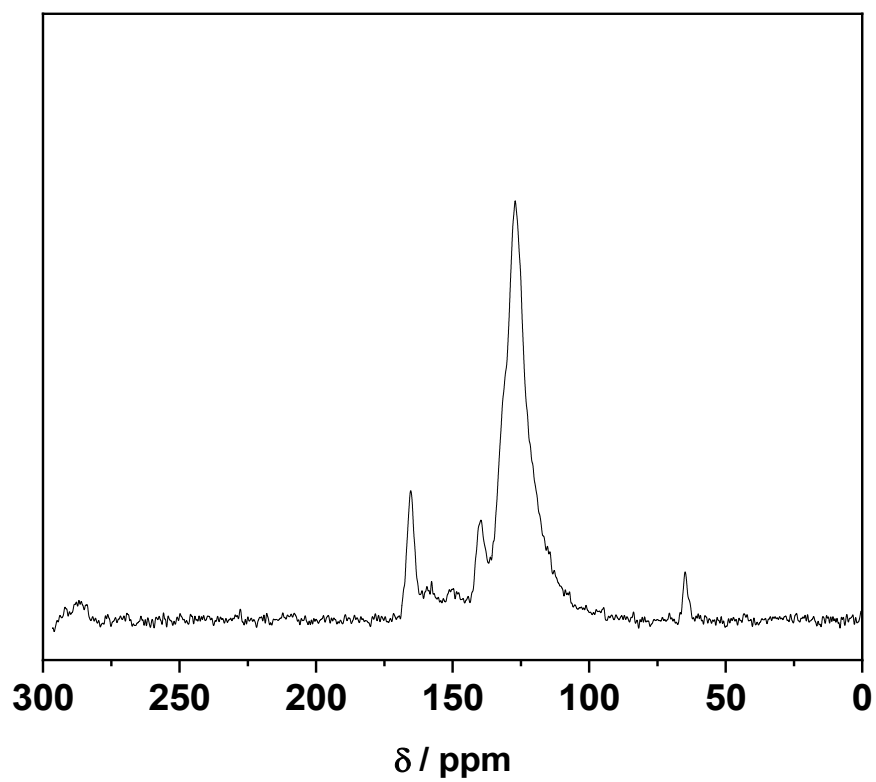

Figure ESI 82: Solid state <sup>13</sup>C-NMR of **PI-11**

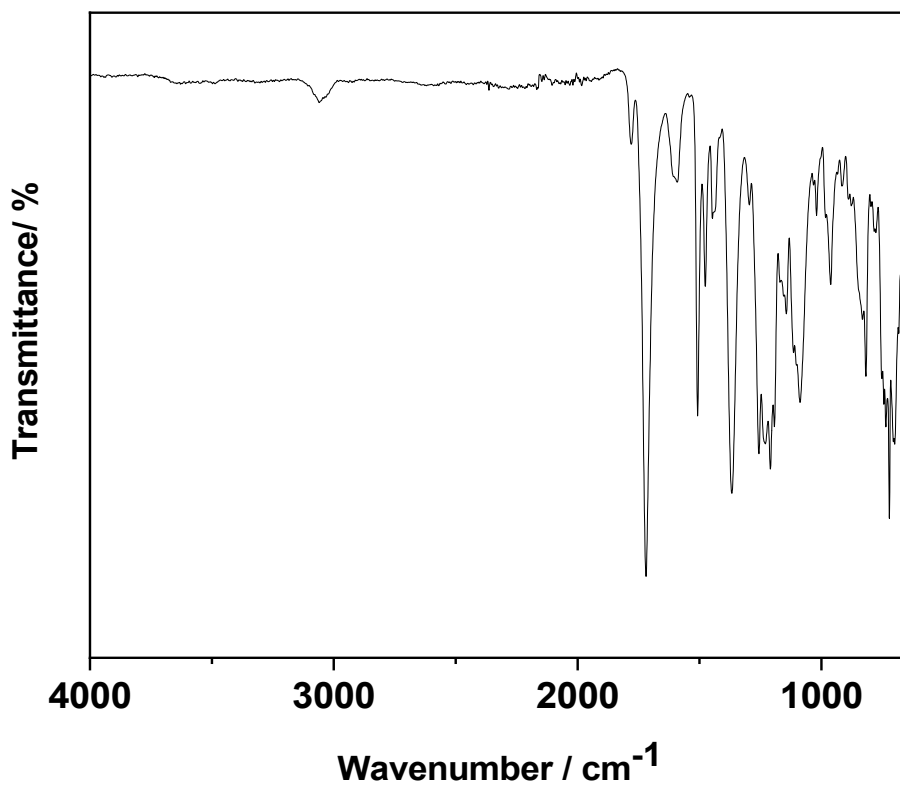

Figure ESI 83: FTIR-ATR of **PI-11**

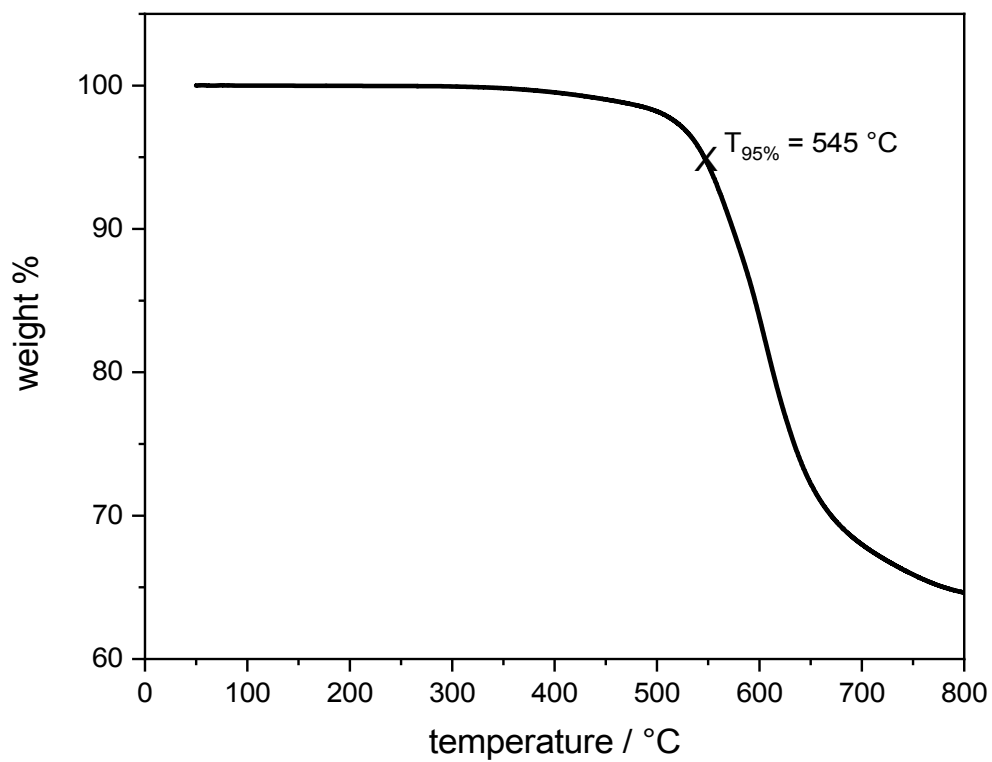

Figure ESI 84: TGA curve of **PI-11** (heating rate 10 °C/min)

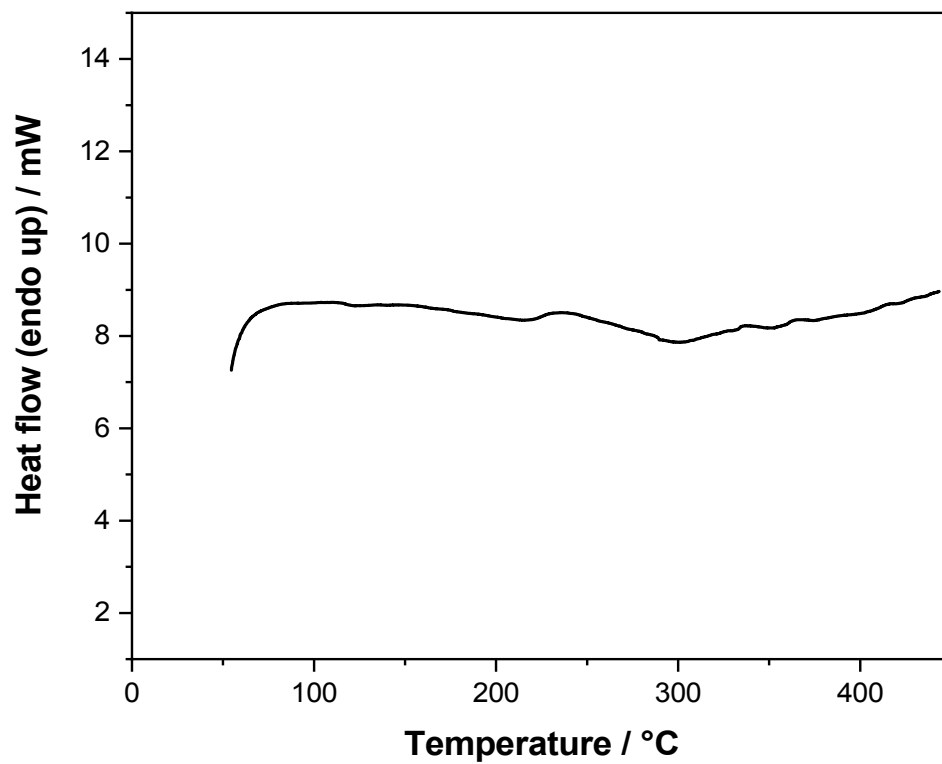

Figure ESI 85: DSC measurement of **PI-11** (second heating cycle, endo up)



Comparisons / Overlays / Tables

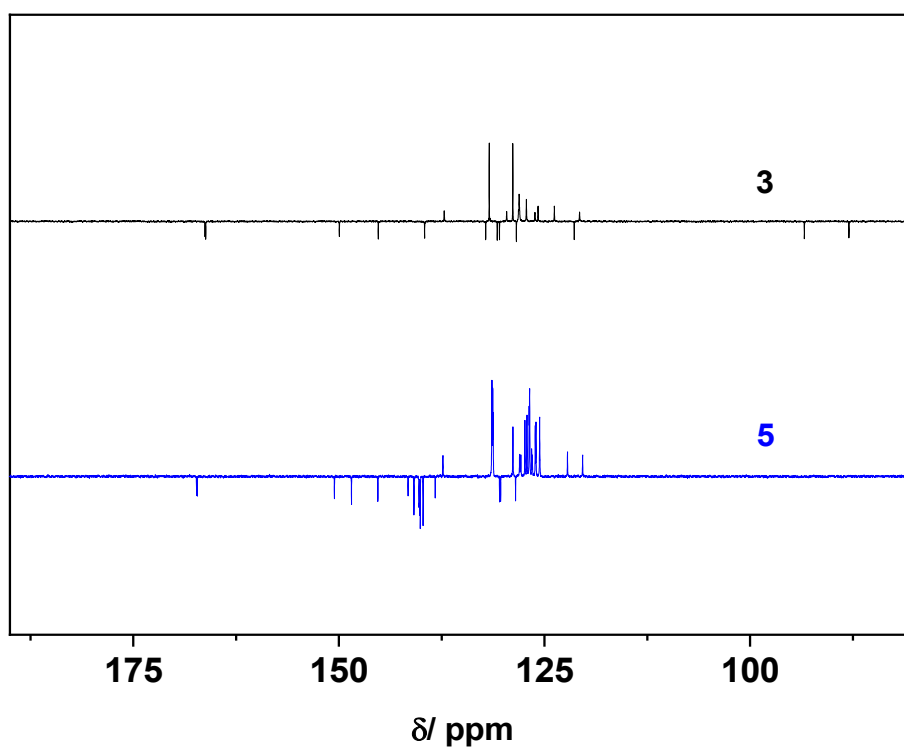

Figure ESI 86: <sup>13</sup>C-NMR of compound **3** (top) and compound **5** (bottom)

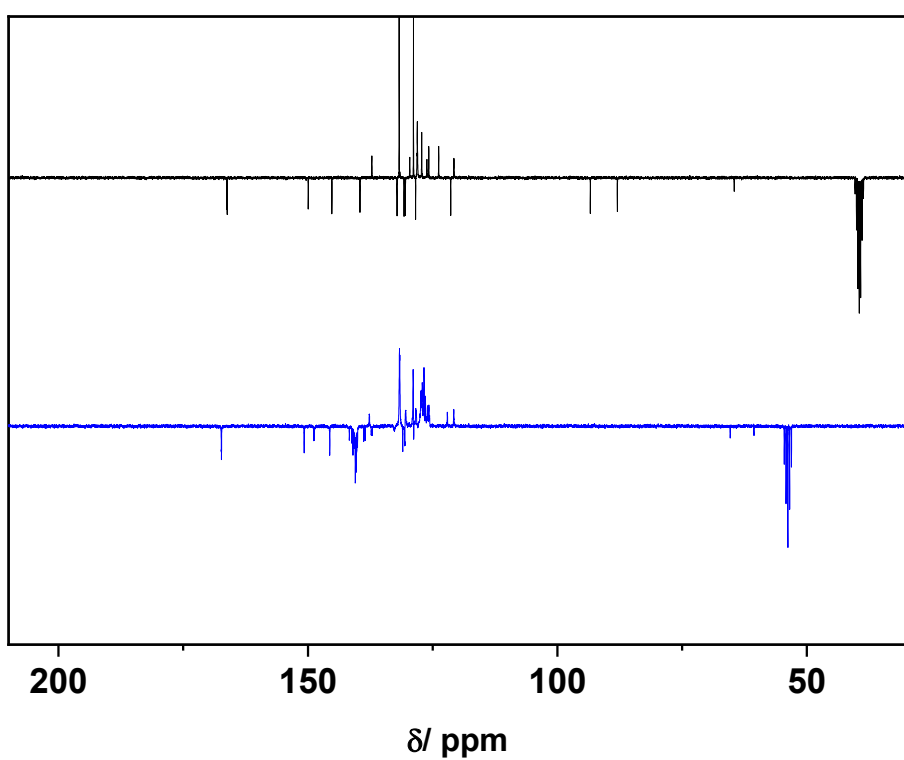

Figure ESI 87: <sup>13</sup>C-NMR of compound **3** (top) and **PI-1** (bottom).

Table ESI 1: Solubility of polymers.

| Polymer | DMF | NMP | DMSO | CHCl <sub>3</sub> | Acetone |
|---------|-----|-----|------|-------------------|---------|
| PI-1    | +   | +   | +    | +                 | -       |
| PI-2    | +   | +   | +    | +                 | -       |
| PI-3    | +   | +   | +    | +                 | -       |
| PI-4    | +   | +   | +    | +                 | -       |
| PI-5    | +   | +   | +    | +                 | +       |
| PI-6    | -   | -   | -    | -                 | -       |
| PI-7    | +   | +   | +    | +                 | -       |
| PI-8    | +   | +   | +    | +                 | +       |
| PI-9    | -   | -   | -    | -                 | -       |
| PI-10   | +   | +   | +    | +                 | -       |
| PI-11   | -   | -   | -    | -                 | -       |
